# Supplementary material
Source: PubMed Central journal article supplement (PMC5448174)
Supplement: pnas.1702412114.sapp.pdf [file pnas.1702412114.sapp.pdf]

# SI Appendix

## Modeling the response of a tumor-suppressive network to mitogenic and oncogenic signals

|                                                                                                          |    |
|----------------------------------------------------------------------------------------------------------|----|
| I. SI Appendix Methods .....                                                                             | 2  |
| Method S1: Details of the model .....                                                                    | 2  |
| Method S2: Interpretations of the functions of proteins .....                                            | 4  |
| Method S3: ODEs of the model.....                                                                        | 7  |
| II. SI Appendix Tables .....                                                                             | 13 |
| Table S1: All species in the model.....                                                                  | 13 |
| Table S2: Reaction kinetics in the model.....                                                            | 16 |
| Table S3: Standard parameter values of the model.....                                                    | 21 |
| III. SI Appendix Results.....                                                                            | 29 |
| 1. Effect of E1A on the expression of cyclins.....                                                       | 29 |
| 2. Dissecting the biphasic dynamics of E2F activation .....                                              | 29 |
| 3. Relative strength of Akt versus ARF expression determines p53 levels .....                            | 29 |
| 4. Dynamics of key components in response to serum starvation and recovery .....                         | 30 |
| 5. Parameter sensitivity analysis .....                                                                  | 30 |
| IV. SI Appendix Figures.....                                                                             | 32 |
| Figure S1: An extended description of cellular signaling involved in tumor suppression .....             | 32 |
| Figure S2: Dynamics of cyclins and effects of ARF and Akt on p53 levels.....                             | 33 |
| Figure S3: Temporal evolution of key proteins involved in apoptosis induction .....                      | 34 |
| Figure S4: Factors that affect cellular outcome .....                                                    | 35 |
| Figure S5: Bifurcation diagrams of steady-state levels of proapoptotic proteins.....                     | 36 |
| Figure S6: Temporal evolution of key proteins in response to serum starvation and recovery...            | 37 |
| Figure S7: Temporal evolution of key proteins involved in apoptosis induction.....                       | 38 |
| Figure S8: Dependence of the bifurcation diagrams and $T_0$ - $C$ and $F_C$ - $C$ curves on p53 mode.... | 39 |
| Figure S9: Parameter sensitivity analysis .....                                                          | 40 |
| V. References .....                                                                                      | 41 |

# I. SI Appendix Methods

## Method S1: Details of the model

The model comprises three modules. In the following, we describe each module in detail.

### 1. Regulation of cell proliferation (Fig. S1B)

The central node of this module is activator E2F (E2F1, E2F2 and E2F3A), transactivating genes involved in cell cycle entry and DNA replication. The E2F-RB pathway is responsible for the control of the restriction (*R*) point. In quiescent cells, RB remains in a hypo-phosphorylated status and actively represses the transcriptional activity of E2F by blocking its transactivation domain (TD). Upon serum stimulation, cyclin D is induced by growth factors or Myc and forms a complex with Cdk4/6 to phosphorylate RB, which releases E2F from the repression by RB. Myc also induces the production of E2F. E2F facilitates its own activation through two positive feedback loops: E2F transactivates cyclin E, and cyclin E/Cdk2 phosphorylates RB, which further releases E2F; E2F also mediates its own transcription. Because of these positive feedback loops, E2F exhibits bistability in response to serum stimulation<sup>1</sup>.

The framework of this module is derived from Ref. 1, and recent experimental advances are incorporated to differentiate E2F1 from other activator E2Fs (E2F2 and E2F3A). There are three major revisions: 1) The active E2F1 released from RB's inhibition by E1A remains in the E1A-RB complex through the interaction between E2F1 and RB<sup>2,3</sup>; 2) the cyclin-mediated phosphorylation of RB only releases the TD of E2F1 from RB, but E2F1 still associates with RB through the interaction between its Marked Box and a C-terminal region of RB<sup>4</sup>; 3) both E1A and RB protect activator E2F from degradation<sup>5,6</sup> and associate with E2F to form the E1A-E2F and RB-E2F complexes<sup>7,8</sup>. Additionally, E1A stabilizes RB through their interactions<sup>2</sup>. Phosphorylated RB is resistant to binding E1A<sup>9</sup>.

### 2. p53 activation (Fig. S1C)

There are two opposing factors regulating p53 expression through MDM2—ARF and Akt. Growth factors (GFs) in serum promote the transcription of *mdm2*<sup>10</sup> and Akt activation via phosphorylation. Active Akt phosphorylates MDM2, enhancing its nuclear accumulation. As a transcriptional target of p53, MDM2 in turn targets p53 for degradation. p53 induces the production of PTEN<sup>11</sup>, a phosphatase that dephosphorylates the PIP3 kinase, which is required for the activation of Akt<sup>12</sup>. Thus, Akt, MDM2, p53 and PTEN enclose a positive feedback loop. On the other hand, ARF blocks the E3 ligase activity of MDM2 toward p53. Notably, the interaction between MDM2 and ARF is

significantly stronger than that between MDM2<sub>p</sub> and ARF<sup>13</sup>.

### 3. Apoptosis induction by p53 and E2F1 (Fig. S1D)

We focus on the intrinsic apoptotic pathway, which triggers apoptosis in a mitochondria-dependent manner. The caspase-activation cascade makes up the backbone of the module. The active Bax protein is able to form pores in the outer membrane of mitochondria, leading to the release of cytochrome *c* (Cyt *c*) from mitochondria to the cytoplasm<sup>14-17</sup>. Released Cyt *c* then binds to and activates Apaf-1 (apoptotic protease-activating factor-1) to form the caspase-activating complex, apoptosome<sup>18,19</sup>. Recruited to the apoptosome, procaspase-9 forms dimers, undergoes autoprocessing and becomes proteolytically active. The active caspase-9 dimer, either free or bound to the apoptosome, then leads to activation of the executor caspase-3<sup>19,22,23</sup>. Furthermore, active caspase-3 promotes the release of Cyt *c*. Specifically, the ratio of caspase-9 to apoptosome is 1:1, and the activated caspase-9 dimer on apoptosome can continuously be displaced by procaspase-9<sup>20,21</sup>.

E2F1 promotes apoptosis through inducing the production of Apaf-1, procaspase-9 and procaspase-3<sup>22</sup>, while p53 induces Bax and thus initiates the apoptotic program<sup>23</sup>. p21, induced by p53, is able to interact with procaspase-3 to block its activation. Active caspase-3 in turn catalyzes the cleavage and inactivation of p21. Some redundant regulatory pathways, especially anti-apoptotic proteins and their interactions (e.g., p53/Bcl-2/Bax and Smac/IAPs/caspase pathways), are omitted here.

The bistability and threshold-crossing mechanisms underlying the action of effector caspases have been explored extensively<sup>24-26</sup>. In our model, this feature is imparted by two positive feedback loops. One is the caspase-3-mediated amplification of Cyt *c* release, and the other involves the interactions between p21, p21<sub>p</sub>, procaspase-3 and caspase-3. The caspase-3-mediated mitochondrial amplification loop is engaged in ARF-dependent apoptosis<sup>27</sup>.

## **Method S2: Interpretations of the functions of proteins**

### **1. Function and regulation of the ARF tumor suppressor**

The ARF protein is a major factor linking the RB-E2F and MDM2-p53 pathways. ARF is encoded in part by an alternative reading frame within the second of three exons that comprise the *INK4A* gene. Particularly, the *Arf* gene is not expressed in most normal tissues, but induced upon oncogenic signals. ARF activates the p53-mediated tumor suppressive program through antagonizing the E3 ligase activity of MDM2<sup>28</sup>.

In human cells, the transcriptional activation of ARF is mainly attributed to activator E2F<sup>29</sup>. In unstressed cells, the *Arf* promoter is actively suppressed by E2F3B or Bim-1<sup>30-32</sup>, which buffers against the transcriptional activity of activator E2F. As cells are infected with E1A, this adenovirus protein functions through multiple ways to induce cell transformation, and a dominant one is to disrupt the elegantly controlled RB-E2F interaction<sup>33-35</sup>, which results in ectopic expression of E2F<sup>2</sup>. The binding of hyper-activated E2F to the *Arf* promoter overrides that of repressors, leading to induction of ARF.

### **2. Cell-cycle arrest triggered by p53**

It is well known that the p53 protein can induce G1 cell-cycle arrest in response to multiple cellular stresses, and this role is primarily related to p21<sup>36,37</sup>. p21 binds and inactivates cyclin E/Cdk2, resulting in RB hypo-phosphorylation and activation<sup>38</sup>. Then, activated RB induces the G1 arrest by negative regulation of activator E2F<sup>39</sup>, which mediates the transcription of multiple genes that are crucial for S phase entry and cell cycle progression<sup>40</sup>. Here, RB is inhibited or blocked by E1A irrespective of its phosphorylation status; thus, the G1/S checkpoint is disrupted, with the ectopic expression of E2F and a lack of G1/S arrest.

In addition to G1 arrest, p53 also contributes to G2/M arrest by inducing the transcription of genes like p21 and 14-3-3. Such cell cycle arresters converge to inhibit the activation of Cdc2, which is responsible for G2/M phase transition<sup>41-44</sup>.

### **3. Pro-apoptotic roles of p53 and E2F1**

Upon full activation, both p53 and E2F1 have a pro-apoptotic role. Accumulating evidence suggests that they cooperate to induce apoptosis<sup>45,46</sup>. In addition to E2F1-induced activation of p53 through the E2F-ARF-MDM2 axis, p53 and E2F1 regulate a plethora of target genes. First, they separately transactivate some major pro-apoptotic genes, and these gene products promote apoptosis cooperatively. For example, E2F1 transactivates the expression of procaspase-9 and procaspase-3<sup>22</sup>,

while p53 upregulates the expression of Bax<sup>23</sup>. Second, genes like Aparf-1 and PUMA are transcriptionally activated by both E2F1 and p53<sup>47-49</sup>, while several anti-apoptotic genes, like some Bcl-2 family members, are negatively regulated by both E2F1 and p53<sup>50-53</sup>.

#### 4. Anti-apoptotic and pro-survival roles of Akt

Akt is well known for its pro-survival role and hyperactivity across various tumors. It is activated by the PI3K pathway and mediates the pro-survival signals emanating from diverse extracellular growth or survival signals, such as insulin and growth factors<sup>54,55</sup>. Once activated, Akt functions through multiple and somewhat redundant pathways (Fig. S1A). The pathways included in our model are described in the following:

*a. Phosphorylation of p21.* The phosphorylation at T145 by Akt is one of the best characterized posttranslational modifications of p21. The phosphorylation induces the relocalization of p21 from the nucleus to the cytoplasm<sup>56,57</sup>, where it is exposed to a wide range of binding partners, one of which is procaspase-3. The interaction between p21 and procaspase-3 blocks the proteolytic activation of procaspase-3<sup>58,59</sup>. Here, it is assumed that phosphorylated p21 is evenly distributed between the nucleus and cytoplasm; thus, it functions as a cell-cycle arrester through inhibiting Cdks and an apoptotic inhibitor through repressing procaspase-3 activation. In contrast, dephosphorylated p21 resides exclusively in the nucleus, functioning as a cell-cycle arrester.

*b. Phosphorylation of MDM2.* The phosphorylation of MDM2 by Akt leads to its nuclear accumulation, strengthening its inhibition of p53<sup>13,60,61</sup>. Here, it is assumed that dephosphorylated MDM2 is evenly distributed between the cytoplasm and nucleus, with the same nuclear import and export activity, and phosphorylated MDM2 is mainly located in the nucleus, with the ability to interact with ARF significantly weakened<sup>13,61</sup>.

#### 5. The p21/caspase-3 interaction

Phosphorylated p21 can accumulate in the cytoplasm<sup>56,57</sup>, where it interacts with diverse binding partners, such as procaspase-3 (Pro3). p21 binds to Pro3 through its N-terminal and prevents the conversion of Pro3 to mature caspase-3 (Casp3), thus dampening apoptosis<sup>58,59</sup>. This anti-apoptotic role of p21 is involved in apoptosis induced by p53<sup>62,63</sup> and by ARF<sup>27,64,65</sup>. Activated Casp3 mediates the cleavage and inactivation of p21<sup>66,67</sup>, which is an early event in p53-dependent apoptosis. Thus, the p21/Casp3 interaction forms a positive feedback loop which sensitizes cells to both pro-survival and -apoptotic signals.

## 6. Biphasic release of cytochrome *c*

Accumulating data suggest that Cyt *c* release follows biphasic kinetics<sup>68,69</sup>. The first wave of Cyt *c* release, preceding caspase activation, involves a small pool of soluble Cyt *c* in the intermembrane space (~14% of mitochondrial Cyt *c*). The second wave releases a large pool of Cyt *c* that is normally sequestered by cardiolipin (CL) on the inner membrane and is released upon CL oxidation, which is provoked by the Casp3-mediated cleavage of mitochondrial complexes and increase in ROS, e.g. the Casp3-mediated cleavage of p75 subunit of the respiratory complex I or cytochrome *c*<sub>1</sub><sup>70,71</sup>.

## Method S3: ODEs of the model

### Module 1: Regulation of cell proliferation

#### Case A: Normal growth condition—cell cycle is stimulated by growth factors (GFs)

$$\frac{d[\text{Myc}]}{dt} = \frac{k_{M_S}[S]}{K_S + [S]} + k_{M_E} \left( \frac{[\text{E2F1}] + [\text{E2Fs}]}{K_E + [\text{E2F1}] + [\text{E2Fs}]} \right) + k_{M_E} \left( \frac{[\text{R}_p\text{E}]}{K_{\text{RpE}} + [\text{R}_p\text{E}]} \right) - d_{\text{Myc}}[\text{Myc}] \quad (\text{S1a})$$

$$\frac{d[\text{CycD}]}{dt} = \frac{k_{\text{CD}_S}[S]}{K_S + [S]} + \frac{k_{\text{CD}_M}[\text{Myc}]}{K_M + [\text{Myc}]} - d_{\text{CD}}[\text{CycD}] \quad (\text{S2a})$$

$$\frac{d[\text{CycE}]}{dt} = k_{\text{CE}_E} \left( \frac{[\text{E2F1}] + [\text{E2Fs}]}{K_E + [\text{E2F1}] + [\text{E2Fs}]} \right) + k_{\text{CE}_E} \left( \frac{[\text{R}_p\text{E}]}{K_{\text{RpE}} + [\text{R}_p\text{E}]} \right) - d_{\text{CE}}[\text{CycE}] \quad (\text{S3a})$$

$$\begin{aligned} \frac{d[\text{E2F1}]}{dt} = & k_{\text{E2F}} + \frac{k_{\text{E}_M}[\text{Myc}]}{K_M + [\text{Myc}]} + k_{\text{E}_E} \left( \frac{[\text{Myc}]}{K_M + [\text{Myc}]} \right) \left( \frac{[\text{E2F1}] + [\text{E2Fs}]}{K_E + [\text{E2F1}] + [\text{E2Fs}]} \right) + \\ & k_{\text{E}_E} \left( \frac{[\text{Myc}]}{K_M + [\text{Myc}]} \right) \left( \frac{[\text{R}_p\text{E}]}{K_{\text{RpE}} + [\text{R}_p\text{E}]} \right) + D_{\text{RpE}}[\text{R}_p\text{E}] - k_{\text{RE}}[\text{RB}][\text{E2F1}] - k_{\text{RpE}}[\text{R}_p][\text{E2F1}] - d_{\text{E2F}}[\text{E2F1}] \end{aligned} \quad (\text{S4a})$$

$$\begin{aligned} \frac{d[\text{E2Fs}]}{dt} = & k_{\text{E2F}} + \frac{k_{\text{E}_M}[\text{Myc}]}{K_M + [\text{Myc}]} + k_{\text{E}_E} \left( \frac{[\text{Myc}]}{K_M + [\text{Myc}]} \right) \left( \frac{[\text{E2F1}] + [\text{E2Fs}]}{K_E + [\text{E2F1}] + [\text{E2Fs}]} \right) \\ & + k_{\text{E}_E} \left( \frac{[\text{Myc}]}{K_M + [\text{Myc}]} \right) \left( \frac{[\text{R}_p\text{E}]}{K_{\text{RpE}} + [\text{R}_p\text{E}]} \right) + \frac{k_{\text{p}_{\text{RE}}}[\text{CycD}][\text{REs}]}{K_{\text{CD}} + [\text{REs}]} + \frac{k_{\text{p}_{\text{RE}}}[\text{CycE}][\text{REs}]}{K_{\text{CE}} + [\text{REs}]} \\ & - k_{\text{RE}}[\text{RB}][\text{E2Fs}] - d_{\text{E2F}}[\text{E2Fs}] \end{aligned} \quad (\text{S5a})$$

$$\frac{d[\text{RE}]}{dt} = k_{\text{RE}}[\text{RB}][\text{E2F1}] + \frac{k_{\text{DP2}}[\text{R}_p\text{E}]}{K_{\text{RpE}} + [\text{R}_p\text{E}]} - \frac{k_{\text{p}_{\text{RE}}}[\text{CycD}][\text{RE}]}{K_{\text{CD}} + [\text{RE}]} - \frac{k_{\text{p}_{\text{RE}}}[\text{CycE}][\text{RE}]}{K_{\text{CE}} + [\text{RE}]} - d_{\text{RE}}[\text{RE}] \quad (\text{S6a})$$

$$\frac{d[\text{REs}]}{dt} = k_{\text{RE}}[\text{RB}][\text{E2Fs}] - \frac{k_{\text{p}_{\text{RE}}}[\text{CycD}][\text{REs}]}{K_{\text{CD}} + [\text{REs}]} - \frac{k_{\text{p}_{\text{RE}}}[\text{CycE}][\text{REs}]}{K_{\text{CE}} + [\text{REs}]} - d_{\text{RE}}[\text{REs}] \quad (\text{S7a})$$

$$\frac{d[\text{R}_p\text{E}]}{dt} = \frac{k_{\text{p}_{\text{RE}}}[\text{CycD}][\text{RE}]}{K_{\text{CD}} + [\text{RE}]} + \frac{k_{\text{p}_{\text{RE}}}[\text{CycE}][\text{RE}]}{K_{\text{CE}} + [\text{RE}]} + k_{\text{RpE}}[\text{R}_p][\text{E2F1}] - \frac{k_{\text{DP2}}[\text{R}_p\text{E}]}{K_{\text{RpE}} + [\text{R}_p\text{E}]} - D_{\text{RpE}}[\text{R}_p\text{E}] - d_{\text{RpE}}[\text{R}_p\text{E}] \quad (\text{S8a})$$

$$\frac{d[\text{RB}]}{dt} = k_{\text{RB}} + \frac{k_{\text{DP1}}[\text{R}_p]}{K_{\text{Rp}} + [\text{R}_p]} - \frac{k_{\text{p}_{\text{RB}}}[\text{CycD}][\text{RB}]}{K_{\text{CD}} + [\text{RB}]} - \frac{k_{\text{p}_{\text{RB}}}[\text{CycE}][\text{RB}]}{K_{\text{CE}} + [\text{RB}]} - k_{\text{RE}}[\text{RB}]([\text{E2F1}] + [\text{E2Fs}]) - d_{\text{RB}}[\text{RB}] \quad (\text{S9a})$$

$$\begin{aligned} \frac{d[\text{RB}_p]}{dt} = & \frac{k_{p_{\text{RB}}}[\text{CycD}][\text{RB}]}{K_{\text{CD}} + [\text{RB}]} + \frac{k_{p_{\text{RB}}}[\text{CycE}][\text{RB}]}{K_{\text{CE}} + [\text{RB}]} + \frac{k_{p_{\text{RE}}}[\text{CycD}][\text{REs}]}{K_{\text{CD}} + [\text{REs}]} + \frac{k_{p_{\text{RE}}}[\text{CycE}][\text{REs}]}{K_{\text{CE}} + [\text{REs}]} + \\ & D_{\text{RpE}}[\text{R}_p\text{E}] - \frac{k_{\text{DP1}}[\text{RB}_p]}{K_{\text{RBp}} + [\text{RB}_p]} - k_{\text{RpE}}[\text{RB}_p][\text{E2F1}] - d_{\text{RBp}}[\text{RB}_p] \end{aligned} \quad (\text{S10a})$$

$$\begin{aligned} \frac{d[\text{ARF}]}{dt} = & k_{\text{A}_E} \left( \frac{([\text{E2F1}] + [\text{E2Fs}])^3}{K_{\text{A}_E}^3 + ([\text{E2F1}] + [\text{E2Fs}])^3} \right) + k_{\text{A}_{\text{RpE}}} \left( \frac{[\text{R}_p\text{E}]^3}{K_{\text{A}_{\text{RpE}}}^3 + [\text{R}_p\text{E}]^3} \right) + \\ & D_{\text{MpA}}[\text{MpA}] + D_{\text{MA}}[\text{MA}] - k_{\text{MpA}}[\text{MDM2}_p][\text{ARF}] - k_{\text{MA}}[\text{MDM2}][\text{ARF}] - d_{\text{ARF}}[\text{ARF}] \end{aligned} \quad (\text{S11a})$$

**Case B: Oncogenic condition — cell cycle is stimulated by GFs and/or E1A**

$$\begin{aligned} \frac{d[\text{Myc}]}{dt} = & \frac{k_{\text{M}_S}[S]}{K_S + [S]} + k_{\text{M}_E} \left( \frac{[\text{E2F1}] + [\text{E2Fs}]}{K_E + [\text{E2F1}] + [\text{E2Fs}]} \right) + k_{\text{M}_{E1}} \left( \frac{[\text{E1E1}] + [\text{EsE1}]}{K_{\text{E1}} + [\text{E1E1}] + [\text{EsE1}]} \right) + \\ & k_{\text{M}_E} \left( \frac{[\text{REE1}]}{K_{\text{REE1}} + [\text{REE1}]} \right) + k_{\text{M}_{\text{RpE}}} \left( \frac{[\text{R}_p\text{E}]}{K_{\text{RpE}} + [\text{R}_p\text{E}]} \right) - d_{\text{Myc}}[\text{Myc}] \end{aligned} \quad (\text{S1b})$$

$$\frac{d[\text{CycD}]}{dt} = \frac{k_{\text{CD}_S}[S]}{K_S + [S]} + \frac{k_{\text{CD}_M}[\text{Myc}]}{K_M + [\text{Myc}]} - d_{\text{CD}}[\text{CycD}] \quad (\text{S2b})$$

$$\begin{aligned} \frac{d[\text{CycE}]}{dt} = & k_{\text{CE}_E} \left( \frac{[\text{E2F1}] + [\text{E2Fs}]}{K_E + [\text{E2F1}] + [\text{E2Fs}]} \right) + k_{\text{CE}_{E1}} \left( \frac{[\text{E1E1}] + [\text{EsE1}]}{K_{\text{E1}} + [\text{E1E1}] + [\text{EsE1}]} \right) + \\ & k_{\text{CE}_{\text{RpE}}} \left( \frac{[\text{R}_p\text{E}]}{K_{\text{RpE}} + [\text{R}_p\text{E}]} \right) + k_{\text{CE}_{\text{REE1}}} \left( \frac{[\text{REE1}]}{K_{\text{REE1}} + [\text{REE1}]} \right) - d_{\text{CE}}[\text{CycE}] \end{aligned} \quad (\text{S3b})$$

$$\begin{aligned} \frac{d[\text{E2F1}]}{dt} = & k_{\text{E2F}} + \frac{k_{\text{E}_M}[\text{Myc}]}{K_M + [\text{Myc}]} + k_{\text{E}_E} \left( \frac{[\text{Myc}]}{K_M + [\text{Myc}]} \right) \left( \frac{[\text{E2F1}] + [\text{E2Fs}]}{K_E + [\text{E2F1}] + [\text{E2Fs}]} \right) + \\ & k_{\text{E}_{E1}} \left( \frac{[\text{Myc}]}{K_M + [\text{Myc}]} \right) \left( \frac{[\text{E1E1}] + [\text{EsE1}]}{K_{\text{E1}} + [\text{E1E1}] + [\text{EsE1}]} \right) + \\ & k_{\text{E}_E} \left( \frac{[\text{Myc}]}{K_M + [\text{Myc}]} \right) \left( \frac{[\text{R}_p\text{E}]}{K_{\text{RpE}} + [\text{R}_p\text{E}]} \right) + k_{\text{E}_{E1}} \left( \frac{[\text{Myc}]}{K_M + [\text{Myc}]} \right) \left( \frac{[\text{REE1}]}{K_{\text{REE1}} + [\text{REE1}]} \right) + \\ & D_{\text{RpE}}[\text{R}_p\text{E}] + D_{\text{REE1}}[\text{REE1}] + D_{\text{EE1}}[\text{E1E1}] - k_{\text{RE}}[\text{RB}][\text{E2F1}] - k_{\text{RpE}}[\text{RB}_p][\text{E2F1}] - \\ & k_{\text{EE1}}[\text{E2F1}][\text{E1A}] - k_{\text{REE1}}[\text{RE1}][\text{E2F1}] - d_{\text{E2F}}[\text{E2F1}] \end{aligned} \quad (\text{S4b})$$

$$\begin{aligned} \frac{d[\text{E2Fs}]}{dt} = & k_{\text{E2F}} + \frac{k_{\text{E}_M}[\text{Myc}]}{K_M + [\text{Myc}]} + k_{\text{E}_E} \left( \frac{[\text{Myc}]}{K_M + [\text{Myc}]} \right) \left( \frac{[\text{E2F1}] + [\text{E2Fs}]}{K_E + [\text{E2F1}] + [\text{E2Fs}]} \right) + \\ & k_{\text{E}_{E1}} \left( \frac{[\text{Myc}]}{K_M + [\text{Myc}]} \right) \left( \frac{[\text{E1E1}] + [\text{EsE1}]}{K_{\text{E1}} + [\text{E1E1}] + [\text{EsE1}]} \right) + k_{\text{E}_{\text{RpE}}} \left( \frac{[\text{Myc}]}{K_M + [\text{Myc}]} \right) \left( \frac{[\text{R}_p\text{E}]}{K_{\text{RpE}} + [\text{R}_p\text{E}]} \right) + \\ & k_{\text{E}_{\text{REE1}}} \left( \frac{[\text{Myc}]}{K_M + [\text{Myc}]} \right) \left( \frac{[\text{REE1}]}{K_{\text{REE1}} + [\text{REE1}]} \right) + \frac{k_{p_{\text{RE}}}[\text{CycD}][\text{REs}]}{K_{\text{CD}} + [\text{REs}]} + \frac{k_{p_{\text{RE}}}[\text{CycE}][\text{REs}]}{K_{\text{CE}} + [\text{REs}]} + \\ & k_{\text{RE1}}[\text{REs}][\text{E1A}] + D_{\text{EE1}}[\text{EsE1}] - k_{\text{RE}}[\text{RB}][\text{E2Fs}] - k_{\text{EE1}}[\text{E2Fs}][\text{E1A}] - d_{\text{E2F}}[\text{E2Fs}] \end{aligned} \quad (\text{S5b})$$



$$\frac{d[\text{RE}]}{dt} = k_{\text{RE}}[\text{RB}][\text{E2F1}] + \frac{k_{\text{DP2}}[\text{RpE}]}{K_{\text{DRpE}} + [\text{RpE}]} - \frac{k_{\text{p\_RE}}[\text{CycD}][\text{RE}]}{K_{\text{CD}} + [\text{RE}]} - \frac{k_{\text{p\_RE}}[\text{CycE}][\text{RE}]}{K_{\text{CE}} + [\text{RE}]} - k_{\text{RE1}}[\text{RE}][\text{E1A}] - d_{\text{RE}}[\text{RE}] \quad (\text{S6b})$$

$$\frac{d[\text{REs}]}{dt} = k_{\text{RE}}[\text{RB}][\text{E2Fs}] - \frac{k_{\text{p\_RE}}[\text{CycD}][\text{REs}]}{K_{\text{CD}} + [\text{REs}]} - \frac{k_{\text{p\_RE}}[\text{CycE}][\text{REs}]}{K_{\text{CE}} + [\text{REs}]} - k_{\text{RE1}}[\text{REs}][\text{E1A}] - d_{\text{RE}}[\text{REs}] \quad (\text{S7b})$$

$$\frac{d[\text{RpE}]}{dt} = \frac{k_{\text{p\_RE}}[\text{CycD}][\text{RE}]}{K_{\text{CD}} + [\text{RE}]} + \frac{k_{\text{p\_RE}}[\text{CycE}][\text{RE}]}{K_{\text{CE}} + [\text{RE}]} + \frac{k_{\text{p\_REE1}}[\text{CycD}][\text{REE1}]}{K_{\text{CD}} + [\text{REE1}]} + \frac{k_{\text{p\_REE1}}[\text{CycE}][\text{REE1}]}{K_{\text{CE}} + [\text{REE1}]} + k_{\text{RpE}}[\text{RB}_p][\text{E2F1}] - D_{\text{RpE}}[\text{RpE}] - \frac{k_{\text{DP2}}[\text{RpE}]}{K_{\text{DRpE}} + [\text{RpE}]} - d_{\text{RpE}}[\text{RpE}] \quad (\text{S8b})$$

$$\frac{d[\text{RB}]}{dt} = k_{\text{RB}} + \frac{k_{\text{DP1}}[\text{RB}_p]}{K_{\text{RBp}} + [\text{RB}_p]} - \frac{k_{\text{p\_RB}}[\text{CycD}][\text{RB}]}{K_{\text{CD}} + [\text{RB}]} - \frac{k_{\text{p\_RB}}[\text{CycE}][\text{RB}]}{K_{\text{CE}} + [\text{RB}]} - k_{\text{RE}}[\text{RB}][\text{E2F1}] + k_{\text{RE}}[\text{RB}][\text{E2Fs}] - k_{\text{RE1}}[\text{RB}][\text{E1A}] - k_{\text{RE1}}[\text{RB}][\text{E1E1}] - d_{\text{RB}}[\text{RB}] \quad (\text{S9b})$$

$$\frac{d[\text{RB}_p]}{dt} = \frac{k_{\text{p\_RB}}[\text{CycD}][\text{RB}]}{K_{\text{CD}} + [\text{RB}]} + \frac{k_{\text{p\_RB}}[\text{CycE}][\text{RB}]}{K_{\text{CE}} + [\text{RB}]} + \frac{k_{\text{p\_REE1}}[\text{CycD}][\text{RE1}]}{K_{\text{CD}} + [\text{RE1}]} + \frac{k_{\text{p\_REE1}}[\text{CycE}][\text{RE1}]}{K_{\text{CE}} + [\text{RE1}]} + \frac{k_{\text{p\_REE1}}[\text{CycD}][\text{REs}]}{K_{\text{CD}} + [\text{REs}]} + \frac{k_{\text{p\_REE1}}[\text{CycE}][\text{REs}]}{K_{\text{CE}} + [\text{REs}]} + D_{\text{RpE}}[\text{RpE}] - \frac{k_{\text{DP1}}[\text{RB}_p]}{K_{\text{RBp}} + [\text{RB}_p]} - k_{\text{RpE}}[\text{RB}_p][\text{E2F1}] - k_{\text{RpE}}[\text{RB}_p][\text{E1E1}] - d_{\text{RBp}}[\text{RB}_p] \quad (\text{S10b})$$

$$\frac{d[\text{ARF}]}{dt} = k_{\text{A\_E}} \left( \frac{([\text{E2F1}] + [\text{E2Fs}])^3}{K_{\text{A\_E}}^3 + ([\text{E2F1}] + [\text{E2Fs}])^3} \right) + k_{\text{A\_EE1}} \left( \frac{([\text{E1E1}] + [\text{EsE1}])^3}{K_{\text{A\_EE1}}^3 + ([\text{E1E1}] + [\text{EsE1}])^3} \right) + k_{\text{A\_RpE}} \left( \frac{[\text{RpE}]^3}{K_{\text{A\_RpE}}^3 + [\text{RpE}]^3} \right) + k_{\text{A\_REE1}} \left( \frac{[\text{REE1}]^3}{K_{\text{A\_REE1}}^3 + [\text{REE1}]^3} \right) + D_{\text{MpA}}[\text{MpA}] + D_{\text{MA}}[\text{MA}] - k_{\text{MpA}}[\text{MDM2}_p][\text{ARF}] - k_{\text{MA}}[\text{MDM2}][\text{ARF}] - d_{\text{ARF}}[\text{ARF}] \quad (\text{S11b})$$

$$\frac{d[\text{E1E1}]}{dt} = k_{\text{EE1}}[\text{E2F1}][\text{E1A}] - k_{\text{RE1}}[\text{RB}][\text{E1E1}] - k_{\text{RpE}}[\text{RB}_p][\text{E1E1}] - D_{\text{EE1}}[\text{E1E1}] - d_{\text{EE1}}[\text{E1E1}] \quad (\text{S12})$$

$$\frac{d[\text{EsE1}]}{dt} = k_{\text{EE1}}[\text{E2Fs}][\text{E1A}] - D_{\text{EE1}}[\text{EsE1}] - d_{\text{EE1}}[\text{EsE1}] \quad (\text{S13})$$

$$\frac{d[\text{REE1}]}{dt} = k_{\text{RE1}}[\text{RE}][\text{E1A}] + k_{\text{RE1}}[\text{RB}][\text{E1E1}] + k_{\text{RpE}}[\text{RB}_p][\text{E1E1}] + k_{\text{REE1}}[\text{RE1}][\text{E2F1}] - \frac{k_{\text{p\_REE1}}[\text{CycD}][\text{REE1}]}{K_{\text{CD}} + [\text{REE1}]} - \frac{k_{\text{p\_REE1}}[\text{CycE}][\text{REE1}]}{K_{\text{CE}} + [\text{REE1}]} - D_{\text{REE1}}[\text{REE1}] - d_{\text{REE1}}[\text{REE1}] \quad (\text{S14})$$

$$\frac{d[\text{RE1}]}{dt} = k_{\text{RE1}}[\text{RB}][\text{E1A}] + k_{\text{RE1}}[\text{REs}][\text{E1A}] + D_{\text{REE1}}[\text{REE1}] - \frac{k_{\text{p\_RE1}}[\text{CycD}][\text{RE1}]}{K_{\text{CD}} + [\text{RE1}]} - \frac{k_{\text{p\_RE1}}[\text{CycE}][\text{RE1}]}{K_{\text{CE}} + [\text{RE1}]} - k_{\text{REE1}}[\text{RE1}][\text{E2F1}] - d_{\text{RE1}}[\text{RE1}] \quad (\text{S15})$$

$$\frac{d[\text{E1A}]}{dt} = k_{\text{E1A}} + D_{\text{EE1}}([\text{E1E1}] + [\text{EsE1}]) + \frac{k_{\text{p\_RE1}}[\text{CycD}][\text{RE1}]}{K_{\text{CD}} + [\text{RE1}]} + \frac{k_{\text{p\_RE1}}[\text{CycE}][\text{RE1}]}{K_{\text{CE}} + [\text{RE1}]} + \frac{k_{\text{p\_REE1}}[\text{CycD}][\text{REE1}]}{K_{\text{CD}} + [\text{REE1}]} + \frac{k_{\text{p\_REE1}}[\text{CycE}][\text{REE1}]}{K_{\text{CE}} + [\text{REE1}]} - k_{\text{EE1}}([\text{E2F1}] + [\text{E2Fs}])[\text{E1A}] - k_{\text{RE1}}([\text{RB}] + [\text{RE}] + [\text{REs}])[\text{E1A}] - d_{\text{E1A}}[\text{E1A}] \quad (\text{S16})$$

## Module 2: p53 activation

$$\frac{d[\text{MDM2}]}{dt} = \frac{k_{\text{MD}_S}[S]}{K_{\text{MD}_S} + [S]} + \frac{k_{\text{M}_p}[\text{p53}]^{n_1}}{K_{\text{M}_p}^{n_1} + [\text{p53}]^{n_1}} + D_{\text{MA}}[\text{MA}] + \frac{k_{\text{Dp4}}[\text{MDM2}_p]}{K_{\text{Mp}} + [\text{MDM2}_p]} - k_{\text{MA}}[\text{MDM2}][\text{ARF}] - \frac{k_{\text{p}_M}[\text{Akt}][\text{MDM2}]}{K_{\text{Akt}_M} + [\text{MDM2}]} - d_{\text{Mdm2}}[\text{MDM2}] \quad (\text{S17})$$

$$\frac{d[\text{MDM2}_p]}{dt} = D_{\text{MpA}}[\text{MpA}] + \frac{k_{\text{p}_M}[\text{Akt}][\text{MDM2}]}{K_{\text{Akt}_M} + [\text{MDM2}]} - k_{\text{MpA}}[\text{MDM2}_p][\text{ARF}] - \frac{k_{\text{Dp4}}[\text{MDM2}_p]}{K_{\text{Mp}} + [\text{MDM2}_p]} - d_{\text{Mp}}[\text{MDM2}_p] \quad (\text{S18})$$

$$\frac{d[\text{MA}]}{dt} = k_{\text{MA}}[\text{MDM2}][\text{ARF}] - D_{\text{MA}}[\text{MA}] - d_{\text{MA}}[\text{MA}] \quad (\text{S19})$$

$$\frac{d[\text{MpA}]}{dt} = k_{\text{MpA}}[\text{MDM2}_p][\text{ARF}] - D_{\text{MpA}}[\text{MpA}] - d_{\text{MpA}}[\text{MpA}] \quad (\text{S20})$$

$$\frac{d[\text{p53}]}{dt} = k_{\text{p53}} - \frac{k_{\text{M53}}[\text{MDM2}][\text{p53}]}{K_{\text{M53}} + [\text{p53}]} - \frac{k_{\text{Mp53}}[\text{MDM2}_p][\text{p53}]}{K_{\text{Mp53}} + [\text{p53}]} - d_{\text{p53}}[\text{p53}] \quad (\text{S21})$$

$$\frac{d[\text{PTEN}]}{dt} = k_{\text{PTEN}} + \frac{k_{\text{p}_p}[\text{p53}]^{n_2}}{K_{\text{p}_p}^{n_2} + [\text{p53}]^{n_2}} - d_{\text{PTEN}}[\text{PTEN}] \quad (\text{S22})$$

$$\frac{d[\text{Akt}]}{dt} = \frac{k_{\text{A}_S}[S]}{K_{\text{A}_S} + [S]} \frac{[\text{Akt}]_t - [\text{Akt}]}{K_0 + [\text{Akt}]_t - [\text{Akt}]} - \frac{k_{\text{DP3}}[\text{Akt}]}{K_{\text{Akt}} + [\text{Akt}]} - \frac{k_{\text{A}_P}[\text{PTEN}][\text{Akt}]}{K_{\text{AP}} + [\text{Akt}]} \quad (\text{S23})$$

## Module 3: Apoptosis induction mediated by p53 and E2F1

$$\frac{d[\text{Pro9}]}{dt} = k_{\text{Pro9}} + k_{\text{C9}_E} \left( \frac{[\text{E2F1}]}{K_{\text{C9}_E} + [\text{E2F1}]} \right) + k_{\text{C9}_E} \left( \frac{[\text{E1E1}]}{K_{\text{C9}_E1E1} + [\text{E1E1}]} \right) + k_{\text{C9}_E} \left( \frac{[\text{R}_p\text{E}]}{K_{\text{C9}_R_p\text{E}} + [\text{R}_p\text{E}]} \right) + k_{\text{C9}_E} \left( \frac{[\text{REE1}]}{K_{\text{C9}_R_{EE1}} + [\text{REE1}]} \right) + D_{\text{AP}}[\text{A-Pro9}] - k_{\text{AP}}[\text{Apop}][\text{Pro9}] - k_{\text{A2P}}[\text{A-Pro9}][\text{Pro9}] - d_{\text{Pro9}}[\text{Pro9}] \quad (\text{S24})$$

$$\begin{aligned}
\frac{d[\text{Pro3}]}{dt} = & k_{\text{Pro3}} + k_{\text{C3\_E}} \left( \frac{[\text{E2F1}]}{K_{\text{C3\_E}} + [\text{E2F1}]} \right) + k_{\text{C3\_E}} \left( \frac{[\text{E1E1}]}{K_{\text{C3\_E1E1}} + [\text{E1E1}]} \right) + k_{\text{C3\_E}} \left( \frac{[\text{R}_p\text{E}]}{K_{\text{C3\_RpE}} + [\text{R}_p\text{E}]} \right) + \\
& k_{\text{C3\_E}} \left( \frac{[\text{REE1}]}{K_{\text{C3\_REE1}} + [\text{REE1}]} \right) + D_{21p}[\text{p21}_p - \text{Pro3}] - \frac{k_{\text{AC9}}[\text{A-Casp9}][\text{Pro3}]^{n_5}}{K_{\text{AC9}}^{n_5} + [\text{Pro3}]^{n_5}} - \\
& \frac{k_{\text{C9}}[\text{Casp9}][\text{Pro3}]^{n_5}}{K_{\text{C9}}^{n_5} + [\text{Pro3}]^{n_5}} - k_{21p}[\text{p21}_p][\text{Pro3}] - d_{\text{Pro3}}[\text{Pro3}]
\end{aligned} \tag{S25}$$

$$\begin{aligned}
\frac{d[\text{Apaf-1}]}{dt} = & k_{\text{Apaf1}} + k_{\text{Af\_E}} \left( \frac{[\text{E2F1}]}{K_{\text{Af\_E}} + [\text{E2F1}]} \right) + k_{\text{Af\_E}} \left( \frac{[\text{E1E1}]}{K_{\text{Af\_E1E1}} + [\text{E1E1}]} \right) + k_{\text{Af\_E}} \left( \frac{[\text{R}_p\text{E}]}{K_{\text{Af\_RpE}} + [\text{R}_p\text{E}]} \right) + \\
& k_{\text{Af\_E}} \left( \frac{[\text{REE1}]}{K_{\text{Af\_REE1}} + [\text{REE1}]} \right) + D_{\text{CA}}[\text{C-Apaf1}] - k_{\text{CA}}[\text{Cytc}][\text{Apaf-1}] - d_{\text{Apaf1}}[\text{Apaf-1}]
\end{aligned} \tag{S26}$$

$$\frac{d[\text{p21}]}{dt} = k_{\text{p21}} + \frac{k_{21p}[\text{p53}]^3}{K_{21p}^3 + [\text{p53}]^3} + \frac{k_{\text{DP5}}[\text{p21}_p]}{K_{\text{p21p}} + [\text{p21}_p]} - \frac{k_{\text{p21}}[\text{Akt}][\text{p21}]}{K_{\text{Akt}_p21} + [\text{p21}]} - \frac{k_{\text{C3}}[\text{Casp3}][\text{p21}]}{K_{\text{C3}} + [\text{p21}]} - d_{21}[\text{p21}] \tag{S27}$$

$$\begin{aligned}
\frac{d[\text{p21}_p]}{dt} = & D_{21p}[\text{p21}_p - \text{Pro3}] + \frac{k_{\text{p21}}[\text{Akt}][\text{p21}]}{K_{\text{Akt}_p21} + [\text{p21}]} - k_{21p}[\text{p21}_p][\text{Pro3}] - \frac{k_{\text{DP5}}[\text{p21}_p]}{K_{\text{p21p}} + [\text{p21}_p]} - \\
& \frac{k_{\text{C3}}[\text{Casp3}][\text{p21}_p]}{K_{\text{C3}} + [\text{p21}_p]} - d_{21p}[\text{p21}_p]
\end{aligned} \tag{S28}$$

$$\frac{d[\text{Bax}]}{dt} = k_{\text{Bax}} + \frac{k_{\text{B}_p}[\text{p53}]^{n_3}}{K_{\text{B}_p}^{n_3} + [\text{p53}]^{n_3}} - d_{\text{Bax}}[\text{Bax}] \tag{S29}$$

$$\begin{aligned}
\frac{d[\text{Cytc}]}{dt} = & \left( k_{\text{Cytc}} + k_{\text{C}_B}[\text{Bax}] + \frac{k_{\text{C}_\text{C3}}[\text{Casp3}]^{n_6}}{K_{\text{C}_\text{C3}}^{n_6} + [\text{Casp3}]^{n_6}} \right) [\text{Cytc}_m] + D_{\text{CA}}[\text{C-Apaf1}] - \\
& k_{\text{CA}}[\text{Cytc}][\text{Apaf-1}] - d_{\text{Cytc}}[\text{Cytc}]
\end{aligned} \tag{S30}$$

$$[\text{Cytc}_c] = [\text{Cytc}] + [\text{C-Apaf1}] + 7([\text{Apop}] + [\text{A-Pro9}] + [\text{A-Casp9}])$$

$$[\text{Cytc}_m] = \text{Cytc}_{\text{free}}\text{Cytc}_t + \text{Cytc}_{\text{bound}}\text{Cytc}_t \frac{[\text{Casp3}]^{n_4}}{K_{\text{C}_\text{C3}}^{n_4} + [\text{Casp3}]^{n_4}} - [\text{Cytc}_c]$$

$$\frac{d[\text{C-Apaf1}]}{dt} = k_{\text{CA}}[\text{Cytc}][\text{Apaf-1}] - D_{\text{CA}}[\text{C-Apaf1}] - 7k_{\text{Apop}}[\text{C-Apaf1}]^4 - d_{\text{C-A}}[\text{C-Apaf1}] \tag{S31}$$

$$\begin{aligned}
\frac{d[\text{Apop}]}{dt} = & k_{\text{Apop}}[\text{C-Apaf1}]^4 + D_{\text{AP}}[\text{A-Pro9}] + D_{\text{A2C}}[\text{A-Casp9}] - k_{\text{AP}}[\text{Apop}][\text{Pro9}] - \\
& k_{\text{A2C}}[\text{Apop}][\text{Casp9}] - d_{\text{Apop}}[\text{Apop}]
\end{aligned} \tag{S32}$$

$$\frac{d[\text{A-Pro9}]}{dt} = k_{\text{AP}}[\text{Apop}][\text{Pro9}] - k_{\text{A2P}}[\text{A-Pro9}][\text{Pro9}] - D_{\text{AP}}[\text{A-Pro9}] \tag{S33}$$

$$\frac{d[\text{A-Casp9}]}{dt} = k_{\text{A2P}}[\text{A-Pro9}][\text{Pro9}] + k_{\text{A2C}}[\text{Apop}][\text{Casp9}] - D_{\text{A2C}}[\text{A-Casp9}] \quad (\text{S34})$$

$$\frac{d[\text{Casp9}]}{dt} = D_{\text{A2C}}[\text{A-Casp9}] - k_{\text{A2C}}[\text{Apop}][\text{Casp9}] - d_{\text{C9}}[\text{Casp9}] \quad (\text{S35})$$

$$\frac{d[\text{Casp3}]}{dt} = \frac{k_{\text{AC9}}[\text{A-Casp9}][\text{Pro3}]^{n_5}}{K_{\text{AC9}}^{n_5} + [\text{Pro3}]^{n_5}} + \frac{k_{\text{C9}}[\text{Casp9}][\text{Pro3}]^{n_5}}{K_{\text{C9}}^{n_5} + [\text{Pro3}]^{n_5}} - d_{\text{C3}}[\text{Casp3}] \quad (\text{S36})$$

$$\frac{d[\text{p21}_p\text{-Pro3}]}{dt} = k_{\text{21P}}[\text{p21}_p][\text{Pro3}] - D_{\text{21P}}[\text{p21}_p\text{-Pro3}] - d_{\text{21P}}[\text{p21}_p\text{-Pro3}] \quad (\text{S37})$$

## II. SI Appendix Tables

**Table S1: All species in the model**

In most cases, the initial levels of all proteins are based on their steady-state levels at 10% serum without E1A.

| Variable                   | Meaning and interpretation                                                                                                           | Initial value                       |
|----------------------------|--------------------------------------------------------------------------------------------------------------------------------------|-------------------------------------|
| <b>Species in module 1</b> |                                                                                                                                      |                                     |
| S                          | serum concentration; it is proportional to the concentration of GFs; GFs induce mitogenic signals                                    | serum-rich: 10%<br>serum-free: 0.1% |
| Myc                        | Myc protein                                                                                                                          | 1.21 (0)                            |
| CycD                       | active cyclin D-Cdk4/6 complex                                                                                                       | 0.43 (0)                            |
| CycE                       | active cyclin E-Cdk2 complex                                                                                                         | 0.50 (0)                            |
| E2F1                       | transcription factor E2F1                                                                                                            | 0.28 (0)                            |
| E2Fs                       | E2F2 and E2F3A                                                                                                                       | 0.63 (0)                            |
| RE                         | RB-E2F1 complex                                                                                                                      | 0.29 (0.65)                         |
| REs                        | RB-E2Fs complex                                                                                                                      | 0.36 (0.8)                          |
| R <sub>p</sub> E           | RB <sub>p</sub> -E2F1 complex, keeping the transcriptional activity as free E2F1 while being more resistant to degradation than E2F1 | 0.61 (0)                            |
| RB                         | RB protein                                                                                                                           | 0.021 (1.5)                         |
| RB <sub>p</sub>            | phosphorylated form of RB                                                                                                            | 1.03 (0)                            |
| ARF                        | free ARF protein (p14 <sup>ARF</sup> )                                                                                               | 0.03 (0)                            |
| E1E1                       | E2F1-E1A complex                                                                                                                     | 0                                   |
| EsE1                       | E2Fs-E1A complex                                                                                                                     | 0                                   |
| REE1                       | RB-E2F1-E1A complex, keeping the transcriptional activity as free E2F1 while being more resistant to degradation than E2F1           | 0                                   |
| RE1                        | RB-E1A complex                                                                                                                       | 0                                   |
| E1A                        | adenoviral E1A protein                                                                                                               | 0                                   |
| <b>Species in module 2</b> |                                                                                                                                      |                                     |
| MDM2                       | MDM2 is evenly distributed in the nucleus and cytosol                                                                                | 0.2                                 |
| MDM2 <sub>p</sub>          | phosphorylated MDM2, which is mainly distributed in the nucleus                                                                      | 4.76                                |

|                            |                                                                                                                                            |                 |
|----------------------------|--------------------------------------------------------------------------------------------------------------------------------------------|-----------------|
| MA                         | MDM2-ARF complex                                                                                                                           | 0.038           |
| M <sub>p</sub> A           | MDM2 <sub>p</sub> -ARF complex                                                                                                             | 0.058           |
| p53                        | p53 in the nucleus                                                                                                                         | 0.006           |
| PTEN                       | p53 target, inhibiting Akt activation by dephosphorylating PIP3                                                                            | 0.1             |
| Akt                        | active Akt                                                                                                                                 | 0.78            |
| Akt <sub>t</sub>           | total amount of Akt, which is much more than active Akt and is considered a constant                                                       | 2.5             |
| <b>Species in module 3</b> |                                                                                                                                            |                 |
| Pro9                       | procaspase-9                                                                                                                               | 0.51            |
| Pro3                       | procaspase-3                                                                                                                               | 0.42            |
| Apaf-1                     | one of key components making up the apoptosome                                                                                             | 0.66            |
| p21                        | p53 target, which mainly resides in the nucleus                                                                                            | 0.005           |
| p21 <sub>p</sub>           | phosphorylated p21, which is evenly distributed in the nucleus and cytosol                                                                 | 0.029           |
| Bax                        | active form of Bax (Bax oligomers)                                                                                                         | 0               |
| Cytc                       | free Cyt <i>c</i> in the cytosol                                                                                                           | 0               |
| Cytc <sub>c</sub>          | total Cyt <i>c</i> in the cytosol, comprising Cyt <i>c</i> , C-Apaf1, Apop, A-Pro9 and A-Casp9                                             | --              |
| Cytc <sub>m</sub>          | free and soluble Cyt <i>c</i> in mitochondria, which is ready for release as long as there are pores on the outer membrane of mitochondria | --              |
| Cytc <sub>t</sub>          | total amount of Cyt <i>c</i> within the cell, which is assumed to be a constant                                                            | 2.0 (constant)  |
| Cytc <sub>free</sub>       | ratio of free Cyt <i>c</i> to total amount of Cyt <i>c</i> in mitochondria                                                                 | 0.14 (constant) |
| Cytc <sub>bound</sub>      | ratio of bound Cyt <i>c</i> to total amount of Cyt <i>c</i> in mitochondria                                                                | 0.86 (constant) |
| C-Apaf1                    | Cyt <i>c</i> -Apaf-1 heterodimer                                                                                                           | 0               |
| Apop                       | Apoptosome; the main foci for the activation of caspase-9 and caspase-3                                                                    | 0               |
| A-Pro9                     | the complex comprising one apoptosome and one procaspase-9                                                                                 | 0               |

|                        |                                                                                                                                                         |      |
|------------------------|---------------------------------------------------------------------------------------------------------------------------------------------------------|------|
| A-Casp9                | the complex comprising one apoptosome and two active caspase-9; it is much more efficient than free caspase-9 in catalyzing the activation of caspase-3 | 0    |
| Casp9                  | free caspase-9 dimer, which keeps the activity of catalyzing the cleavage and activation of caspase-3                                                   | 0    |
| Casp3                  | proteolytically active caspase-3 dimer                                                                                                                  | 0    |
| p21 <sub>p</sub> -Pro3 | the complex of phosphorylated p21 and procaspase-3                                                                                                      | 0.17 |

The numbers in parentheses denote the initial values used in plotting Figs. 2C, S2B and S2C (serum-free, without E1A). Such a setting is to follow the experimental protocol in Ref. 1.

**Table S2: Reaction kinetics in the model**

| Reaction                                                                                                                                              | Kinetic equation                                                                                                                                                                                                                                                                                                                                                                                                                                                                                                 |
|-------------------------------------------------------------------------------------------------------------------------------------------------------|------------------------------------------------------------------------------------------------------------------------------------------------------------------------------------------------------------------------------------------------------------------------------------------------------------------------------------------------------------------------------------------------------------------------------------------------------------------------------------------------------------------|
| <b>Synthesis of species</b>                                                                                                                           |                                                                                                                                                                                                                                                                                                                                                                                                                                                                                                                  |
| $* \xrightarrow[S, E, EE1, RpE, REE1]{} \text{Myc}$ $\left( \begin{array}{l} \text{E:E2F1+E2Fs} \\ \text{EE1:E1E1+EsE1} \end{array} \right)$          | $\frac{k_{M\_S}[S]}{K_S + [S]} + k_{M\_E} \left( \frac{[E]}{K_E + [E]} \right) + k_{M\_E} \left( \frac{[EE1]}{K_{EE1} + [EE1]} \right) +$ $k_{M\_E} \left( \frac{[R_pE]}{K_{RpE} + [R_pE]} \right) + k_{M\_E} \left( \frac{[REE1]}{K_{REE1} + [REE1]} \right)$                                                                                                                                                                                                                                                   |
| $* \xrightarrow[S, \text{Myc}]{} \text{CycD}$                                                                                                         | $\frac{k_{CD\_S}[S]}{K_S + [S]} + \frac{k_{CD\_M}[\text{Myc}]}{K_M + [\text{Myc}]}$                                                                                                                                                                                                                                                                                                                                                                                                                              |
| $* \xrightarrow[E, EE1, RpE, REE1]{} \text{CycE}$ $\left( \begin{array}{l} \text{E:E2F1+E2Fs} \\ \text{EE1:E1E1+EsE1} \end{array} \right)$            | $k_{CE\_E} \left( \frac{[E]}{K_E + [E]} \right) + k_{CE\_E} \left( \frac{[EE1]}{K_{EE1} + [EE1]} \right) +$ $k_{CE\_E} \left( \frac{[R_pE]}{K_{RpE} + [R_pE]} \right) + k_{CE\_E} \left( \frac{[REE1]}{K_{REE1} + [REE1]} \right)$                                                                                                                                                                                                                                                                               |
| $* \longrightarrow \text{E2F}$                                                                                                                        | $k_{E2F}$                                                                                                                                                                                                                                                                                                                                                                                                                                                                                                        |
| $* \xrightarrow[\text{Myc}, E, EE1, RpE, REE1]{} \text{E2F}$ $\left( \begin{array}{l} \text{E:E2F1+E2Fs} \\ \text{EE1:E1E1+EsE1} \end{array} \right)$ | $\frac{k_{E\_M}[\text{Myc}]}{K_M + [\text{Myc}]} + k_{E\_E} \left( \frac{[\text{Myc}]}{K_M + [\text{Myc}]} \right) \left( \frac{[E]}{K_E + [E]} \right) +$ $k_{E\_E} \left( \frac{[\text{Myc}]}{K_M + [\text{Myc}]} \right) \left( \frac{[EE1]}{K_{EE1} + [EE1]} \right) +$ $k_{E\_E} \left( \frac{[\text{Myc}]}{K_M + [\text{Myc}]} \right) \left( \frac{[R_pE]}{K_{RpE} + [R_pE]} \right) +$ $k_{E\_E} \left( \frac{[\text{Myc}]}{K_M + [\text{Myc}]} \right) \left( \frac{[REE1]}{K_{REE1} + [REE1]} \right)$ |
| $* \xrightarrow[E, EE1, RpE, REE1]{} \text{ARF}$ $\left( \begin{array}{l} \text{E:E2F1+E2Fs} \\ \text{EE1:E1E1+EsE1} \end{array} \right)$             | $k_{A\_E} \left( \frac{[E]^3}{K_{A\_E}^3 + [E]^3} \right) + k_{A\_EE1} \left( \frac{[EE1]^3}{K_{A\_EE1}^3 + [EE1]^3} \right) +$ $k_{A\_RpE} \left( \frac{[R_pE]^3}{K_{A\_RpE}^3 + [R_pE]^3} \right) + k_{A\_REE1} \left( \frac{[REE1]^3}{K_{A\_REE1}^3 + [REE1]^3} \right)$                                                                                                                                                                                                                                      |
| $* \xrightarrow{p53} \text{MDM2}$                                                                                                                     | $\frac{k_{M\_p}[p53]^{n_1}}{K_{M\_p}^{n_1} + [p53]^{n_1}}$                                                                                                                                                                                                                                                                                                                                                                                                                                                       |
| $* \xrightarrow{S} \text{MDM2}$                                                                                                                       | $\frac{k_{MD\_S}[S]}{K_{MD\_S} + [S]}$                                                                                                                                                                                                                                                                                                                                                                                                                                                                           |



|                                                                     |                                                                                                                                                                                                                                                                                                                                                                                        |
|---------------------------------------------------------------------|----------------------------------------------------------------------------------------------------------------------------------------------------------------------------------------------------------------------------------------------------------------------------------------------------------------------------------------------------------------------------------------|
| $* \xrightarrow{p53} \text{PTEN}$                                   | $\frac{k_{p\_p}[p53]^{n_2}}{K_{p\_p}^{n_2} + [p53]^{n_2}}$                                                                                                                                                                                                                                                                                                                             |
| $* \longrightarrow \text{PTEN}$                                     | $k_{\text{PTEN}}$                                                                                                                                                                                                                                                                                                                                                                      |
| $* \longrightarrow \text{E1A}$                                      | $k_{\text{E1A}}$                                                                                                                                                                                                                                                                                                                                                                       |
| $* \longrightarrow \text{RB}$                                       | $k_{\text{RB}}$                                                                                                                                                                                                                                                                                                                                                                        |
| $* \longrightarrow \text{p53}$                                      | $k_{p53}$                                                                                                                                                                                                                                                                                                                                                                              |
| $* \xrightarrow{\text{E2F1, E1E1, R}_p\text{E, REE1}} \text{Pro9}$  | $k_{C9\_E} \left( \frac{[\text{E2F1}]}{K_{C9\_E} + [\text{E2F1}]} \right) + k_{C9\_E} \left( \frac{[\text{E1E1}]}{K_{C9\_E1E1} + [\text{E1E1}]} \right) +$<br>$k_{C9\_E} \left( \frac{[\text{R}_p\text{E}]}{K_{C9\_RpE} + [\text{R}_p\text{E}]} \right) + k_{C9\_E} \left( \frac{[\text{REE1}]}{K_{C9\_REE1} + [\text{REE1}]} \right)$                                                 |
| $* \longrightarrow \text{Pro9}$                                     | $k_{\text{Pro9}}$                                                                                                                                                                                                                                                                                                                                                                      |
| $* \xrightarrow{\text{E2F1, E1E1, R}_p\text{E, REE1}} \text{Pro3}$  | $k_{C3\_E} \left( \frac{[\text{E2F1}]}{K_{C3\_E} + [\text{E2F1}]} \right) + k_{C3\_E} \left( \frac{[\text{E1E1}]}{K_{C3\_E1E1} + [\text{E1E1}]} \right) +$<br>$k_{C3\_E} \left( \frac{[\text{R}_p\text{E}]}{K_{C3\_RpE} + [\text{R}_p\text{E}]} \right) + k_{C3\_E} \left( \frac{[\text{REE1}]}{K_{C3\_REE1} + [\text{REE1}]} \right)$                                                 |
| $* \longrightarrow \text{Pro3}$                                     | $k_{\text{Pro3}}$                                                                                                                                                                                                                                                                                                                                                                      |
| $* \xrightarrow{\text{E2F1, E1E1, R}_p\text{E, REE1}} \text{Apaf1}$ | $k_{\text{Af}_E} \left( \frac{[\text{E2F1}]}{K_{\text{Af}_E} + [\text{E2F1}]} \right) + k_{\text{Af}_E} \left( \frac{[\text{E1E1}]}{K_{\text{Af}_E1E1} + [\text{E1E1}]} \right) +$<br>$k_{\text{Af}_E} \left( \frac{[\text{R}_p\text{E}]}{K_{\text{Af}_RpE} + [\text{R}_p\text{E}]} \right) + k_{\text{Af}_E} \left( \frac{[\text{REE1}]}{K_{\text{Af}_REE1} + [\text{REE1}]} \right)$ |
| $* \longrightarrow \text{Apaf-1}$                                   | $k_{\text{Apaf1}}$                                                                                                                                                                                                                                                                                                                                                                     |
| $* \xrightarrow{p53} \text{p21}$                                    | $\frac{k_{21\_p}[p53]^3}{K_{21\_p}^3 + [p53]^3}$                                                                                                                                                                                                                                                                                                                                       |
| $* \longrightarrow \text{p21}$                                      | $k_{p21}$                                                                                                                                                                                                                                                                                                                                                                              |
| $* \xrightarrow{p53} \text{Bax}$                                    | $\frac{k_{B\_p}[p53]^{n_3}}{K_{B\_p}^{n_3} + [p53]^{n_3}}$                                                                                                                                                                                                                                                                                                                             |
| $* \longrightarrow \text{Bax}$                                      | $k_{\text{Bax}}$                                                                                                                                                                                                                                                                                                                                                                       |
| $* \xrightarrow{\text{Bax}} \text{Cyt c}$                           | $k_{C\_B}[\text{Bax}][\text{Cyt c}_m]$                                                                                                                                                                                                                                                                                                                                                 |

|                                                                                                                          |                                                                                                                                                         |
|--------------------------------------------------------------------------------------------------------------------------|---------------------------------------------------------------------------------------------------------------------------------------------------------|
| $* \xrightarrow{\text{Casp3}} \text{Cytc}$                                                                               | $\frac{k_{C\_C3}[\text{Casp3}]^{n_6}}{K_{C\_C3}^{n_6} + [\text{Casp3}]^{n_6}} [\text{Cytc}_m]$                                                          |
| $* \xrightarrow{\text{Casp3}} \text{Cytc}_m$                                                                             | $\text{Cytc}_{\text{bound}} \text{Cytc}_t \frac{[\text{Casp3}]^{n_4}}{K_{Ct\_C3}^{n_4} + [\text{Casp3}]^{n_4}}$                                         |
| $* \longrightarrow \text{Cytc}$                                                                                          | $k_{\text{Cytc}} [\text{Cytc}_m]$                                                                                                                       |
| <b>Complex formation and disassociation</b>                                                                              |                                                                                                                                                         |
| $\text{RB} + \text{E2F1/E2Fs} \longrightarrow \text{RE/REs}$                                                             | $k_{\text{RE}} [\text{RB}] [\text{E2F1}], k_{\text{RE}} [\text{RB}] [\text{E2Fs}]$                                                                      |
| $\text{RB}_p + \text{E2F1} \longleftrightarrow \text{R}_p\text{E}$                                                       | $k_{\text{RpE}} [\text{RB}_p] [\text{E2F1}];$<br>$D_{\text{RpE}} [\text{R}_p\text{E}]$                                                                  |
| $\text{E2F1} + \text{E1A} \longleftrightarrow \text{E1E1}$<br>$\text{E2Fs} + \text{E1A} \longleftrightarrow \text{EsE1}$ | $k_{\text{EE1}} [\text{E2F1}] [\text{E1A}], D_{\text{EE1}} [\text{E1E1}];$<br>$k_{\text{EE1}} [\text{E2Fs}] [\text{E1A}], D_{\text{EE1}} [\text{EsE1}]$ |
| $\text{RB} + \text{E1A} \longrightarrow \text{RE1}$                                                                      | $k_{\text{RE1}} [\text{RB}] [\text{E1A}]$                                                                                                               |
| $\text{RE} + \text{E1A} \longrightarrow \text{REE1}$                                                                     | $k_{\text{RE1}} [\text{RE}] [\text{E1A}]$                                                                                                               |
| $\text{REs} + \text{E1A} \longrightarrow \text{RE1} + \text{E2Fs}$                                                       | $k_{\text{RE1}} [\text{REs}] [\text{E1A}]$                                                                                                              |
| $\text{RB} + \text{E1E1} \longrightarrow \text{REE1}$                                                                    | $k_{\text{RE1}} [\text{RB}] [\text{E1E1}]$                                                                                                              |
| $\text{RB}_p + \text{E1E1} \longrightarrow \text{REE1}$                                                                  | $k_{\text{RpE}} [\text{RB}_p] [\text{E1E1}]$                                                                                                            |
| $\text{RE1} + \text{E2F1} \longrightarrow \text{REE1}$                                                                   | $k_{\text{REE1}} [\text{RE1}] [\text{E2F1}]$                                                                                                            |
| $\text{MDM2}_p + \text{ARF} \longleftrightarrow \text{M}_p\text{A}$                                                      | $k_{\text{MpA}} [\text{MDM2}_p] [\text{ARF}]$<br>$D_{\text{MpA}} [\text{M}_p\text{A}]$                                                                  |
| $\text{MDM2} + \text{ARF} \longleftrightarrow \text{MA}$                                                                 | $k_{\text{MA}} [\text{MDM2}] [\text{ARF}]$<br>$D_{\text{MA}} [\text{MA}]$                                                                               |
| $\text{REE1} \longrightarrow \text{RE1} + \text{E2F1}$                                                                   | $D_{\text{REE1}} [\text{REE1}]$                                                                                                                         |
| $\text{Cytc} + \text{Apaf1} \longleftrightarrow \text{C-Apaf1}$                                                          | $k_{\text{CA}} [\text{Cytc}] [\text{Apaf-1}]$<br>$D_{\text{CA}} [\text{C-Apaf1}]$                                                                       |
| $7\text{C-Apaf1} \longrightarrow \text{Apop}$                                                                            | $k_{\text{Apop}} [\text{C-Apaf1}]^4$                                                                                                                    |
| $\text{p21}_p + \text{Pro3} \longleftrightarrow \text{p21}_p\text{-Pro3}$                                                | $k_{21p} [\text{p21}_p] [\text{Pro3}]$<br>$D_{21p} [\text{p21}_p\text{-Pro3}]$                                                                          |
| <b>Protein phosphorylation</b>                                                                                           |                                                                                                                                                         |
| $\text{RB} \xrightarrow{\text{CycD, CycE}} \text{RB}_p$                                                                  | $\frac{k_{p\_RB} [\text{CycD}] [\text{RB}]}{K_{\text{CD}} + [\text{RB}]} + \frac{k_{p\_RB} [\text{CycE}] [\text{RB}]}{K_{\text{CE}} + [\text{RB}]}$     |

|                                                    |                                                                                                                   |
|----------------------------------------------------|-------------------------------------------------------------------------------------------------------------------|
| $RE \xrightarrow{\text{CycD, CycE}} R_p E$         | $\frac{k_{p\_RE}[\text{CycD}][RE]}{K_{CD} + [RE]} + \frac{k_{p\_RE}[\text{CycE}][RE]}{K_{CE} + [RE]}$             |
| $REs \xrightarrow{\text{CycD, CycE}} RB_p + E2Fs$  | $\frac{k_{p\_RE}[\text{CycD}][REs]}{K_{CD} + [REs]} + \frac{k_{p\_RE}[\text{CycE}][REs]}{K_{CE} + [REs]}$         |
| $RE1 \xrightarrow{\text{CycD, CycE}} RB_p + E1A$   | $\frac{k_{p\_RE1}[\text{CycD}][RE1]}{K_{CD} + [RE1]} + \frac{k_{p\_RE1}[\text{CycE}][RE1]}{K_{CE} + [RE1]}$       |
| $REE1 \xrightarrow{\text{CycD, CycE}} R_p E + E1A$ | $\frac{k_{p\_REE1}[\text{CycD}][REE1]}{K_{CD} + [REE1]} + \frac{k_{p\_REE1}[\text{CycE}][REE1]}{K_{CE} + [REE1]}$ |
| $Akt_u \xrightarrow{S} Akt$                        | $\frac{k_{A\_S}[S]}{K_{A\_S} + [S]} \frac{[Akt]_t - [Akt]}{K_0 + [Akt]_t - [Akt]}$                                |
| $MDM2 \xrightarrow{Akt} MDM2_p$                    | $\frac{k_{p\_M}[Akt][MDM2]}{K_{Akt\_M} + [MDM2]}$                                                                 |
| $p21 \xrightarrow{Akt} p21_p$                      | $\frac{k_{p\_21}[Akt][p21]}{K_{Akt\_p21} + [p21]}$                                                                |
| <b>Protein dephosphorylation</b>                   |                                                                                                                   |
| $RB_p \longrightarrow RB$                          | $\frac{k_{DP1}[RB_p]}{K_{RBp} + [RB_p]}$                                                                          |
| $R_p E \longrightarrow RE$                         | $\frac{k_{DP2}[R_p E]}{K_{DRpE} + [R_p E]}$                                                                       |
| $Akt \longrightarrow Akt_u$                        | $\frac{k_{DP3}[Akt]}{K_{Akt} + [Akt]}$                                                                            |
| $Akt \xrightarrow{PTEN} Akt_u$                     | $\frac{k_{A\_P}[PTEN][Akt]}{K_{AP} + [Akt]}$                                                                      |
| $MDM2_p \longrightarrow MDM2$                      | $\frac{k_{DP4}[MDM2_p]}{K_{Mp} + [MDM2_p]}$                                                                       |
| $p21_p \longrightarrow p21$                        | $\frac{k_{DP5}[p21_p]}{K_{p21p} + [p21_p]}$                                                                       |
| <b>Caspase cascade</b>                             |                                                                                                                   |
| $Apop + Pro9 \longleftrightarrow A-Pro9$           | $k_{AP}[Apop][Pro9]$<br>$D_{AP}[A-Pro9]$                                                                          |

|                                                                                      |                                                                                                                                                                               |
|--------------------------------------------------------------------------------------|-------------------------------------------------------------------------------------------------------------------------------------------------------------------------------|
| $A\text{-Pro9} + \text{Pro9} \longrightarrow A\text{-Casp9}$                         | $k_{A2p}[A\text{-Pro9}][\text{Pro9}]$                                                                                                                                         |
| $\text{Apop} + \text{Casp9} \longleftrightarrow A\text{-Casp9}$                      | $k_{A2c}[\text{Apop}][\text{Casp9}]$<br>$D_{A2c}[A\text{-Casp9}]$                                                                                                             |
| $\text{Pro3} \xrightarrow{A\text{-Casp9}, \text{Casp9}} \text{Casp3}$                | $\frac{k_{AC9}[A\text{-Casp9}][\text{Pro3}]^{n_5}}{K_{AC9}^{n_5} + [\text{Pro3}]^{n_5}} + \frac{k_{C9}[\text{Casp9}][\text{Pro3}]^{n_5}}{K_{C9}^{n_5} + [\text{Pro3}]^{n_5}}$ |
| <b>Degradation of different species</b>                                              |                                                                                                                                                                               |
| $\text{Myc} \longrightarrow *$                                                       | $d_{\text{Myc}}[\text{Myc}]$                                                                                                                                                  |
| $\text{CycD} \longrightarrow *, \text{CycE} \longrightarrow *$                       | $d_{\text{CD}}[\text{CycD}], d_{\text{CE}}[\text{CycE}]$                                                                                                                      |
| $\text{E2F1}, \text{E2Fs} \longrightarrow *$                                         | $d_{\text{E2F}}[\text{E2F1}], d_{\text{E2F}}[\text{E2Fs}]$                                                                                                                    |
| $\text{RE}, \text{REs} \longrightarrow *$                                            | $d_{\text{RE}}[\text{RE}], d_{\text{RE}}[\text{REs}]$                                                                                                                         |
| $\text{R}_p\text{E} \longrightarrow *$                                               | $d_{\text{RpE}}[\text{R}_p\text{E}]$                                                                                                                                          |
| $\text{E1E1}, \text{EsE1} \longrightarrow *$                                         | $d_{\text{EE1}}[\text{E1E1}], d_{\text{EE1}}[\text{EsE1}]$                                                                                                                    |
| $\text{REE1} \longrightarrow *$                                                      | $d_{\text{REE1}}[\text{REE1}]$                                                                                                                                                |
| $\text{RB} \longrightarrow *, \text{RB}_p \longrightarrow *$                         | $d_{\text{RB}}[\text{RB}], d_{\text{RBp}}[\text{RB}_p]$                                                                                                                       |
| $\text{RE1} \longrightarrow *$                                                       | $d_{\text{RE1}}[\text{RE1}]$                                                                                                                                                  |
| $\text{ARF} \longrightarrow *$                                                       | $d_{\text{ARF}}[\text{ARF}]$                                                                                                                                                  |
| $\text{MDM2} \longrightarrow *, \text{MDM2}_p \longrightarrow *$                     | $d_{\text{Mdm2}}[\text{MDM2}], d_{\text{Mp}}[\text{MDM2}_p]$                                                                                                                  |
| $\text{MA} \longrightarrow *, \text{MpA} \longrightarrow *$                          | $d_{\text{MA}}[\text{MA}], d_{\text{MpA}}[\text{MpA}]$                                                                                                                        |
| $\text{E1A} \longrightarrow *$                                                       | $d_{\text{E1A}}[\text{E1A}]$                                                                                                                                                  |
| $\text{PTEN} \longrightarrow *$                                                      | $d_{\text{PTEN}}[\text{PTEN}]$                                                                                                                                                |
| $\text{p53} \longrightarrow *$                                                       | $d_{\text{p53}}[\text{p53}]$                                                                                                                                                  |
| $\text{p53} \xrightarrow{\text{MDM2}} *, \text{p53} \xrightarrow{\text{MDM2}_p} *$   | $\frac{k_{\text{M53}}[\text{MDM2}][\text{p53}]}{K_{\text{M53}} + [\text{p53}]}, \frac{k_{\text{Mp53}}[\text{MDM2}_p][\text{p53}]}{K_{\text{Mp53}} + [\text{p53}]}$            |
| $\text{p21} \longrightarrow *, \text{p21}_p \longrightarrow *$                       | $d_{21}[\text{p21}], d_{21p}[\text{p21}_p]$                                                                                                                                   |
| $\text{p21}_p\text{-Pro3} \longrightarrow *$                                         | $d_{21p}[\text{p21}_p - \text{Pro3}]$                                                                                                                                         |
| $\text{p21}_p \xrightarrow{\text{Casp3}} *, \text{p21} \xrightarrow{\text{Casp3}} *$ | $\frac{k_{\text{C3}}[\text{Casp3}][\text{p21}_p]}{K_{\text{C3}} + [\text{p21}_p]}, \frac{k_{\text{C3}}[\text{Casp3}][\text{p21}]}{K_{\text{C3}} + [\text{p21}]}$              |
| $\text{Bax} \longrightarrow *$                                                       | $d_{\text{Bax}}[\text{Bax}]$                                                                                                                                                  |
| $\text{CytC} \longrightarrow *, \text{Apaf-1} \longrightarrow *$                     | $d_{\text{CytC}}[\text{CytC}], d_{\text{Apaf1}}[\text{Apaf-1}]$                                                                                                               |
| $\text{C-Apaf1} \longrightarrow *, \text{Apop} \longrightarrow *$                    | $d_{\text{C-A}}[\text{C-Apaf1}], d_{\text{Apop}}[\text{Apop}]$                                                                                                                |
| $\text{Pro9} \longrightarrow *, \text{Casp9} \longrightarrow *$                      | $d_{\text{Pro9}}[\text{Pro9}], d_{\text{C9}}[\text{Casp9}]$                                                                                                                   |
| $\text{Pro3} \longrightarrow *, \text{Casp3} \longrightarrow *$                      | $d_{\text{Pro3}}[\text{Pro3}], d_{\text{C3}}[\text{Casp3}]$                                                                                                                   |

**Table S3: Standard parameter values of the model**

| Parameter                   | Value                        | Interpretation                                                                                                   |
|-----------------------------|------------------------------|------------------------------------------------------------------------------------------------------------------|
| <b>Synthesis of species</b> |                              |                                                                                                                  |
| $k_{M\_S}$                  | 0.6 $\mu\text{M}/\text{h}$   | Rate constant of Myc expression induced by serum; adapted from Ref.1                                             |
| $k_{M\_E}$                  | 0.1 $\mu\text{M}/\text{h}$   | Rate constant of E2F-mediated expression of Myc                                                                  |
| $k_{CD\_S}$                 | 0.5 $\mu\text{M}/\text{h}$   | Rate constant of cyclin D expression induced by serum                                                            |
| $k_{CD\_M}$                 | 0.11 $\mu\text{M}/\text{h}$  | Rate constant of Myc-mediated expression of cyclin D                                                             |
| $k_{CE\_E}$                 | 0.35 $\mu\text{M}/\text{h}$  | Rate constant of E2F-mediated expression of cyclin E; adapted from Ref. 1                                        |
| $k_{E2F}$                   | 0.005 $\mu\text{M}/\text{h}$ | Basal rate constant of E2F expression                                                                            |
| $k_{E\_M}$                  | 0.001 $\mu\text{M}/\text{h}$ | Rate constant of Myc-mediated expression of E2F; adapted from Ref. 1                                             |
| $k_{E\_E}$                  | 0.15 $\mu\text{M}/\text{h}$  | Rate constant of E2F-mediated expression of E2F; adapted from Ref.1                                              |
| $k_{A\_E}$                  | 0.25 $\mu\text{M}/\text{h}$  | Rate constant of E2F-mediated expression of ARF                                                                  |
| $k_{A\_EE1}$                | 0.5 $\mu\text{M}/\text{h}$   | Rate constant of ARF expression mediated by the E2F-E1A complex                                                  |
| $k_{A\_RpE}$                | 0.25 $\mu\text{M}/\text{h}$  | Rate constant of ARF expression mediated by the RB <sub>p</sub> -E2F1 complex                                    |
| $k_{A\_REE1}$               | 0.5 $\mu\text{M}/\text{h}$   | Rate constant of ARF expression mediated by the RB-E2F1-E1A complex                                              |
| $k_{MD\_S}$                 | 0.66 $\mu\text{M}/\text{h}$  | Rate constant of MDM2 expression induced by serum; it is nearly twice the degradation rate of MDM2 <sup>72</sup> |
| $k_{M\_p}$                  | 0.33 $\mu\text{M}/\text{h}$  | Rate constant of p53-mediated expression of MDM2                                                                 |
| $n_1$                       | 4                            | Hill coefficient of p53-dependent expression of MDM2                                                             |
| $k_{p\_p}$                  | 0.7 $\mu\text{M}/\text{h}$   | Rate constant of p53-dependent synthesis of PTEN <sup>11</sup>                                                   |
| $n_2$                       | 3                            | Hill coefficient of p53-dependent synthesis of PTEN                                                              |
| $k_{PTEN}$                  | 0.05 $\mu\text{M}/\text{h}$  | Basal expression rate of PTEN                                                                                    |
| $k_{E1A}$                   | 0.8 $\mu\text{M}/\text{h}$   | Basal rate constant of E1A expression                                                                            |
| $k_{RB}$                    | 0.18 $\mu\text{M}/\text{h}$  | Basal rate constant of RB expression; adapted from Ref. 1                                                        |
| $k_{p53}$                   | 4.8 $\mu\text{M}/\text{h}$   | Basal rate constant of p53 expression, estimated at 0.005~0.2 $\mu\text{M}/\text{min}$ <sup>72</sup>             |
| $k_{C9\_E}$                 | 0.1 $\mu\text{M}/\text{h}$   | Rate constant of E2F1-induced expression of procaspase-9                                                         |
| $k_{Pro9}$                  | 0.01 $\mu\text{M}/\text{h}$  | Basal rate constant of procaspase-9 expression                                                                   |
| $k_{C3\_E}$                 | 0.15 $\mu\text{M}/\text{h}$  | Rate constant of E2F1-induced procaspase-3 expression                                                            |
| $k_{Pro3}$                  | 0.01 $\mu\text{M}/\text{h}$  | Basal rate constant of procaspase-3 expression                                                                   |

|                 |                              |                                                                                                                                                   |
|-----------------|------------------------------|---------------------------------------------------------------------------------------------------------------------------------------------------|
| $k_{Af_E}$      | 0.55 $\mu\text{M}/\text{h}$  | Rate constant of E2F1-induced Apaf-1 expression                                                                                                   |
| $k_{Apaf1}$     | 0.055 $\mu\text{M}/\text{h}$ | Basal rate constant of Apaf-1 expression                                                                                                          |
| $k_{21_p}$      | 1.2 $\mu\text{M}/\text{h}$   | Rate constant of p53-induced p21 expression                                                                                                       |
| $k_{p21}$       | 0.1 $\mu\text{M}/\text{h}$   | Basal rate constant of p21 expression                                                                                                             |
| $k_{B_p}$       | 0.1 $\mu\text{M}/\text{h}$   | Rate constant of p53-induced expression and activation of Bax                                                                                     |
| $n_3$           | 3                            | Hill coefficient of p53-induced expression and activation of Bax                                                                                  |
| $k_{Bax}$       | 0 $\mu\text{M}/\text{h}$     | Basal activation rate of Bax                                                                                                                      |
| $K_S$           | 0.5%                         | Michaelis constant for transcription of cell-cycle regulators (e.g. Myc, cyclin D) triggered by growth factors; adapted from Ref. 1               |
| $K_{MD_S}$      | 0.45%                        | Michaelis constant for MDM2 expression triggered by growth factors                                                                                |
| $K_M$           | 0.5 $\mu\text{M}$            | Michaelis constant for Myc-mediated expression of target genes (e.g. cyclin D and E2F)                                                            |
| $K_E$           | 0.2 $\mu\text{M}$            | Michaelis constant for E2F-mediated expression of target genes (e.g. Myc, Cyclin E and E2F)                                                       |
| $K_{A_E}$       | 1.3 $\mu\text{M}$            | Hill constant for E2F-mediated expression of ARF; it is assumed to be significantly greater than $K_E$                                            |
| $K_{C9_E}$      | 0.7 $\mu\text{M}$            | Michaelis constant for E2F-mediated expression of procaspase-9                                                                                    |
| $K_{C3_E}$      | 0.5 $\mu\text{M}$            | Michaelis constant for E2F-mediated expression of procaspase-3                                                                                    |
| $K_{Af_E}$      | 0.5 $\mu\text{M}$            | Michaelis constant for E2F-mediated expression of Apaf-1                                                                                          |
| $K_{EE1}$       | 0.2 $\mu\text{M}$            | Michaelis constant for E2F-E1A-mediated expression of target genes (e.g. Myc, Cyclin E and E2F)                                                   |
| $K_{A_{EE1}}$   | 0.8 $\mu\text{M}$            | Hill constant for E2F-E1A-mediated expression of ARF                                                                                              |
| $K_{C9_{E1E1}}$ | 0.7 $\mu\text{M}$            | Michaelis constant for E2F-E1A-mediated expression of procaspase-9                                                                                |
| $K_{C3_{E1E1}}$ | 0.5 $\mu\text{M}$            | Michaelis constant for E2F-E1A-mediated expression of procaspase-3                                                                                |
| $K_{Af_{E1E1}}$ | 0.5 $\mu\text{M}$            | Michaelis constant for E2F-E1A-mediated expression of Apaf-1                                                                                      |
| $K_{RpE}$       | 0.2 $\mu\text{M}$            | Michaelis constant for $\text{RB}_p$ -E2F-mediated expression of target genes (e.g. Myc, Cyclin E and E2F); it is assumed to be the same as $K_E$ |
| $K_{A_{RpE}}$   | 1.3 $\mu\text{M}$            | Hill constant for $\text{RB}_p$ -E2F-mediated expression of ARF, assumed to be greater than $K_{RpE}$                                             |
| $K_{C9_{RpE}}$  | 1 $\mu\text{M}$              | Michaelis constant for $\text{RB}_p$ -E2F-mediated expression of procaspase-9                                                                     |
| $K_{C3_{RpE}}$  | 0.5 $\mu\text{M}$            | Michaelis constant for $\text{RB}_p$ -E2F-mediated expression of procaspase-3                                                                     |
| $K_{Af_{RpE}}$  | 1 $\mu\text{M}$              | Michaelis constant for $\text{RB}_p$ -E2F-mediated expression of Apaf-1                                                                           |

|                                            |                                     |                                                                                                     |
|--------------------------------------------|-------------------------------------|-----------------------------------------------------------------------------------------------------|
| $K_{REE1}$                                 | 0.2 $\mu\text{M}$                   | Michaelis constant for RB-E2F1-E1A-mediated expression of target genes (e.g. Myc, Cyclin E and E2F) |
| $K_{A\_REE1}$                              | 0.8 $\mu\text{M}$                   | Hill constant for RB-E2F1-E1A-mediated expression of ARF                                            |
| $K_{C9\_REE1}$                             | 0.7 $\mu\text{M}$                   | Michaelis constant for RB-E2F1-E1A-mediated expression of procaspase-9                              |
| $K_{C3\_REE1}$                             | 0.5 $\mu\text{M}$                   | Michaelis constant for RB-E2F1-E1A-mediated expression of procaspase-3                              |
| $K_{Af\_REE1}$                             | 0.5 $\mu\text{M}$                   | Michaelis constant for RB-E2F1-E1A-mediated expression of Apaf-1                                    |
| $K_{M\_p}$                                 | 0.5 $\mu\text{M}$                   | Hill constant for p53-induced expression of MDM2                                                    |
| $K_{P\_p}$                                 | 1 $\mu\text{M}$                     | Hill constant for p53-induced expression of PTEN, greater than that of MDM2 <sup>72</sup>           |
| $K_{21\_p}$                                | 0.3 $\mu\text{M}$                   | Hill constant for p53-induced expression of p21                                                     |
| $K_{B\_p}$                                 | 0.7 $\mu\text{M}$                   | Hill constant for p53-induced activation of Bax                                                     |
| <b>Complex formation or disassociation</b> |                                     |                                                                                                     |
| $k_{RE}$                                   | 180 /( $\mu\text{M}\cdot\text{h}$ ) | Rate constant for RB/E2F association; adapted from Ref. 1                                           |
| $k_{RpE}$                                  | 60 /( $\mu\text{M}\cdot\text{h}$ )  | Rate constant for RB <sub>p</sub> /E2F1 association, estimated based on $k_{RE}$                    |
| $D_{RpE}$                                  | 30 /h                               | Rate constant for RB <sub>p</sub> -E2F1 disassociation, estimated based on $k_{RpE}$                |
| $k_{EE1}$                                  | 60 /( $\mu\text{M}\cdot\text{h}$ )  | Rate constant for E2F/E1A association                                                               |
| $D_{EE1}$                                  | 30 /h                               | Rate constant for E2F-E1A disassociation                                                            |
| $k_{RE1}$                                  | 180 /( $\mu\text{M}\cdot\text{h}$ ) | Rate constant for RB-E1A association                                                                |
| $k_{REE1}$                                 | 60 /( $\mu\text{M}\cdot\text{h}$ )  | Rate constant for the association between RB-E1A and E2F1                                           |
| $D_{REE1}$                                 | 100 /h                              | Rate constant for the disassociation of the RB-E2F1-E1A complex                                     |
| $k_{MA}$                                   | 43 /( $\mu\text{M}\cdot\text{h}$ )  | Rate constant for MDM2/ARF association                                                              |
| $D_{MA}$                                   | 6 /h                                | Rate constant for MDM2-ARF disassociation                                                           |
| $k_{MpA}$                                  | 10 /( $\mu\text{M}\cdot\text{h}$ )  | Rate constant for MDM2 <sub>p</sub> /ARF association                                                |
| $D_{MpA}$                                  | 24 /h                               | Rate constant for MDM2 <sub>p</sub> -ARF disassociation                                             |
| $k_{CA}$                                   | 10 /( $\mu\text{M}\cdot\text{h}$ )  | Rate constant for Cyt c/Apaf-1 association                                                          |
| $D_{CA}$                                   | 2 /h                                | Rate constant for Cyt c-Apaf-1 disassociation                                                       |
| $k_{Apop}$                                 | 10 /( $\mu\text{M}\cdot\text{h}$ )  | Rate constant for apoptosome formation from Cyt c-Apaf-1 dimers                                     |

|                                             |                                    |                                                                                                                                                                    |
|---------------------------------------------|------------------------------------|--------------------------------------------------------------------------------------------------------------------------------------------------------------------|
| $k_{21P}$                                   | 20 /( $\mu\text{M}\cdot\text{h}$ ) | Rate constant for p21 <sub>p</sub> /procaspase3 association                                                                                                        |
| $D_{21P}$                                   | 1 /h                               | Rate constant for p21 <sub>p</sub> -procaspase3 disassociation                                                                                                     |
| <b>Phosphorylation or dephosphorylation</b> |                                    |                                                                                                                                                                    |
| $k_{p\_RB}$                                 | 18 /h                              | Rate constant for RB phosphorylation; adapted from Ref. 1                                                                                                          |
| $k_{DP1}$                                   | 3.6 $\mu\text{M}/\text{h}$         | Rate constant for RB <sub>p</sub> dephosphorylation; adapted from Ref. 1                                                                                           |
| $k_{p\_RE}$                                 | 9 /h                               | Rate constant for RB-E2F phosphorylation, assumed to be slower than RB phosphorylation due to additional allosteric transformation                                 |
| $k_{DP2}$                                   | 1 $\mu\text{M}/\text{h}$           | Rate constant for RB <sub>p</sub> -E2F1 dephosphorylation, assumed to be slower than RB <sub>p</sub> dephosphorylation due to additional allosteric transformation |
| $k_{p\_RE1}$                                | 9 /h                               | Rate constant for RB-E1A phosphorylation, assumed to be slower than RB phosphorylation due to additional allosteric transformation                                 |
| $k_{p\_REE1}$                               | 9 /h                               | Rate constant for RB-E2F1-E1A phosphorylation, assumed to be slower than RB phosphorylation due to additional allosteric transformation                            |
| $k_{A\_S}$                                  | 12.9 $\mu\text{M}/\text{h}$        | Rate constant for Akt phosphorylation induced by growth factors                                                                                                    |
| $k_{DP3}$                                   | 9.6 $\mu\text{M}/\text{h}$         | Rate constant for Akt dephosphorylation                                                                                                                            |
| $k_{A\_P}$                                  | 30 /h                              | Rate constant for PTEN-induced Akt dephosphorylation; referring to the dephosphorylation of PIP3 by PTEN <sup>72</sup>                                             |
| $k_{p\_M}$                                  | 56 /h                              | Rate constant for MDM2 phosphorylation mediated by Akt                                                                                                             |
| $k_{DP4}$                                   | 12 $\mu\text{M}/\text{h}$          | Rate constant for MDM2 <sub>p</sub> dephosphorylation                                                                                                              |
| $k_{p\_21}$                                 | 20 /h                              | Rate constant for p21 phosphorylation mediated by Akt                                                                                                              |
| $k_{DP5}$                                   | 3 $\mu\text{M}/\text{h}$           | Rate constant for p21 <sub>p</sub> dephosphorylation                                                                                                               |
| $K_{CD}$                                    | 0.92 $\mu\text{M}$                 | Michaelis constant for cyclin D-mediated phosphorylation; experimentally measured <sup>1</sup>                                                                     |
| $K_{CE}$                                    | 0.92 $\mu\text{M}$                 | Michaelis constant for cyclin E-mediated phosphorylation, assumed to be the same as $K_{CD}$ <sup>1</sup>                                                          |
| $K_{A\_S}$                                  | 1.47%                              | Michaelis constant for Akt activation triggered by growth factors                                                                                                  |
| $K_0$                                       | 0.35 $\mu\text{M}$                 | Threshold of the total enzyme amount for Akt activation                                                                                                            |
| $K_{Akt\_M}$                                | 0.5 $\mu\text{M}$                  | Michaelis constant for Akt-mediated phosphorylation of MDM2 <sup>72</sup>                                                                                          |
| $K_{Akt\_p21}$                              | 0.4 $\mu\text{M}$                  | Michaelis constant for Akt-mediated phosphorylation of p21, estimated based on $K_{Akt\_M}$                                                                        |



|                                      |                                     |                                                                                                                                                                              |
|--------------------------------------|-------------------------------------|------------------------------------------------------------------------------------------------------------------------------------------------------------------------------|
| $K_{RBp}$                            | 0.01 $\mu\text{M}$                  | Michaelis constant for $\text{RB}_p$ dephosphorylation; it takes the typical value of the Michaelis constant for dephosphorylation <sup>1</sup>                              |
| $K_{DRpE}$                           | 0.01 $\mu\text{M}$                  | Michaelis constant for $\text{RB}_p$ -E2F1 dephosphorylation, assumed to be the same as $K_{RBp}$                                                                            |
| $K_{Akt}$                            | 0.2 $\mu\text{M}$                   | Michaelis constant for Akt dephosphorylation                                                                                                                                 |
| $K_{AP}$                             | 0.6 $\mu\text{M}$                   | Michaelis constant for PTEN-induced Akt dephosphorylation; referring to the Michaelis constant for PTEN-mediated PIP3 dephosphorylation, 0.1~0.5 $\mu\text{M}$ <sup>72</sup> |
| $K_{Mp}$                             | 0.081 $\mu\text{M}$                 | Michaelis constant for $\text{MDM2}_p$ dephosphorylation <sup>72</sup>                                                                                                       |
| $K_{p21p}$                           | 1 $\mu\text{M}$                     | Michaelis constant for $\text{p21}_p$ dephosphorylation                                                                                                                      |
| <b>Activation of caspase cascade</b> |                                     |                                                                                                                                                                              |
| $k_{\text{Cyt}c}$                    | 0.001 /h                            | Rate constant for the basal releasing rate of Cyt $c$                                                                                                                        |
| $k_{C\_B}$                           | 4 /( $\mu\text{M}\cdot\text{h}$ )   | Rate constant for Cyt $c$ release mediated by Bax oligomers                                                                                                                  |
| $n_6$                                | 2                                   | Hill coefficient for further release of Cyt $c$ mediated by caspase-3                                                                                                        |
| $k_{C\_C3}$                          | 40 /h                               | Rate constant for further release of Cyt $c$ induced by caspase-3                                                                                                            |
| $K_{C\_C3}$                          | 0.3 $\mu\text{M}$                   | Hill constant for further release of Cyt $c$ induced by caspase-3                                                                                                            |
| $\text{Cyt}c_{\text{free}}$          | 0.14                                | fraction of free Cyt $c$ in mitochondria                                                                                                                                     |
| $\text{Cyt}c_{\text{bound}}$         | 0.86                                | fraction of tightly-bound Cyt $c$ in mitochondria                                                                                                                            |
| $\text{Cyt}c_t$                      | 2 $\mu\text{M}$                     | Total amount of Cyt $c$ , equaling the homeostasis level of Apaf-1 <sup>73</sup>                                                                                             |
| $K_{\text{Cl}_C3}$                   | 0.3 $\mu\text{M}$                   | Threshold for caspase-3-induced release of tightly-bound Cyt $c$ into the intermembrane space of mitochondria                                                                |
| $n_4$                                | 4                                   | Hill coefficient for caspase-3-induced solution of Cyt $c$                                                                                                                   |
| $k_{AP}$                             | 10 /( $\mu\text{M}\cdot\text{h}$ )  | Rate constant for association between apoptosome and procaspase-9                                                                                                            |
| $D_{AP}$                             | 0.5 /h                              | Rate constant for disassociation of the A-Pro9 complex                                                                                                                       |
| $k_{A2P}$                            | 10 /( $\mu\text{M}\cdot\text{h}$ )  | Rate constant for association between A-Pro9 and procaspase-9                                                                                                                |
| $k_{A2C}$                            | 0.5 /( $\mu\text{M}\cdot\text{h}$ ) | Rate constant for association between apoptosome and caspase-9                                                                                                               |
| $D_{A2C}$                            | 1 /h                                | Rate constant for disassociation of the A-Casp9 holoenzyme                                                                                                                   |
| $k_{AC9}$                            | 11 /h                               | Rate constant for caspase-3 activation by A-Casp9                                                                                                                            |
| $K_{AC9}$                            | 0.4 $\mu\text{M}$                   | Hill constant for caspase-3 activation by A-Casp9                                                                                                                            |
| $n_5$                                | 2                                   | Hill coefficient for caspase-3 activation by A-Casp9                                                                                                                         |

|                                                                                                |             |                                                                                                                                                                                                                                                                                      |
|------------------------------------------------------------------------------------------------|-------------|--------------------------------------------------------------------------------------------------------------------------------------------------------------------------------------------------------------------------------------------------------------------------------------|
| $k_{C9}$                                                                                       | 0.01 /h     | Rate constant for caspase-3 activation by caspase-9                                                                                                                                                                                                                                  |
| $K_{C9}$                                                                                       | 1.5 $\mu$ M | Hill constant for caspase-3 activation by caspase-9                                                                                                                                                                                                                                  |
| $n_5$                                                                                          | 2           | Hill coefficient for caspase-3 activation by caspase-9                                                                                                                                                                                                                               |
| <b>Protein degradation (<math>d_{protein} = \ln 2 / T_{1/2} \approx 0.69 / T_{1/2}</math>)</b> |             |                                                                                                                                                                                                                                                                                      |
| $d_{Myc}$                                                                                      | 0.6 /h      | Rate constant for Myc degradation; its half-life is about 1 h <sup>1</sup>                                                                                                                                                                                                           |
| $d_{CD}$                                                                                       | 1.3 /h      | Half-life of CycD is 25-30 min <sup>1</sup>                                                                                                                                                                                                                                          |
| $d_{CE}$                                                                                       | 1.1 /h      | Half-life of CycE is about 30 min <sup>1</sup>                                                                                                                                                                                                                                       |
| $d_{E2F}$                                                                                      | 0.25 /h     | Half-life of E2F is 2~3 h <sup>5,6</sup>                                                                                                                                                                                                                                             |
| $d_{RE}$                                                                                       | 0.04 /h     | Half-life of RE is about 12 h <sup>5,6</sup>                                                                                                                                                                                                                                         |
| $d_{RpE}$                                                                                      | 0.15 /h     | Half-life of RB <sub>p</sub> E is about 6 h <sup>5,6</sup>                                                                                                                                                                                                                           |
| $d_{EE1}$                                                                                      | 0.065 /h    | Half-life of E2F-E1A is 10-12 h <sup>6</sup>                                                                                                                                                                                                                                         |
| $d_{REE1}$                                                                                     | 0.065 /h    | Assumed to be the same as $d_{EE1}$                                                                                                                                                                                                                                                  |
| $d_{RB}$                                                                                       | 0.06 /h     | Half-life of RB is about 12 h <sup>1</sup>                                                                                                                                                                                                                                           |
| $d_{RBP}$                                                                                      | 0.06 /h     | Assumed to be the same as $d_{RB}$ <sup>1</sup>                                                                                                                                                                                                                                      |
| $d_{RE1}$                                                                                      | 0.01 /h     | Half-life of RB-E1A is assumed to be 60 h (E1A protects RB from degradation, which is assumed to be in a similar mechanism to E1A interfering E2F turnover <sup>74</sup> )                                                                                                           |
| $d_{ARF}$                                                                                      | 1 /h        | Half-life of p19 <sup>ARF</sup> is 6-8 h <sup>75</sup> , while that of p14 <sup>ARF</sup> is about 30 min <sup>76</sup>                                                                                                                                                              |
| $d_{Mdm2}$                                                                                     | 0.5 /h      | Half-life of MDM2 is about 90 min <sup>77</sup>                                                                                                                                                                                                                                      |
| $d_{Mp}$                                                                                       | 0.1 /h      | Degradation rate of MDM2 <sub>p</sub> is about 5-fold slower than that of MDM2 <sup>60</sup>                                                                                                                                                                                         |
| $d_{MA}$                                                                                       | 0.6 /h      | Degradation rate of the MDM2-ARF complex                                                                                                                                                                                                                                             |
| $d_{MpA}$                                                                                      |             | Assumed to be the same as $d_{MA}$ <sup>78</sup>                                                                                                                                                                                                                                     |
| $d_{E1A}$                                                                                      | 0.5 /h      | Half-life of E1A is 20-80 min <sup>79</sup>                                                                                                                                                                                                                                          |
| $d_{PTEN}$                                                                                     | 0.5 /h      | Half-life of PTEN is longer than 8 h <sup>80,81</sup> , but PTEN normally undergoes posttranslational modification, which keeps it in an inactive form. The rate constant $d_{PTEN}$ actually represents the decay rate of active PTEN and is much greater than its degradation rate |
| $d_{p53}$                                                                                      | 3.6 /h      | Half-life of p53 is 5-20 min <sup>13,82,83</sup>                                                                                                                                                                                                                                     |

|             |             |                                                                                                                                                                                                    |
|-------------|-------------|----------------------------------------------------------------------------------------------------------------------------------------------------------------------------------------------------|
| $k_{M53}$   | 5 /h        | Rate constant for MDM2-mediated p53 degradation, assumed to be slower than that mediated by phosphorylated MDM2 <sup>13</sup>                                                                      |
| $K_{M53}$   | 0.5 $\mu$ M | Assumed to be 5-fold that mediated by MDM2 <sub>p</sub>                                                                                                                                            |
| $k_{Mp53}$  | 18 /h       | Rate constant for MDM2 <sub>p</sub> -mediated p53 degradation <sup>84</sup> , assumed to be 5-fold $d_{p53}$                                                                                       |
| $K_{Mp53}$  | 0.1 $\mu$ M | Michaelis constant for MDM2-mediated p53 degradation <sup>84</sup>                                                                                                                                 |
| $d_{21}$    | 1.2 /h      | Half-life of p21 in U2OS cells is 30–60 min <sup>85</sup>                                                                                                                                          |
| $d_{21p}$   | 0.4 /h      | Half-life of phosphorylated p21 is about 5-6 h <sup>86</sup>                                                                                                                                       |
| $d_{21P}$   | 0.5 /h      | Rate constant for degradation of the p21 <sub>p</sub> -procaspase-3 complex; estimated.                                                                                                            |
| $k_{C3}$    | 3 /h        | Rate constant for the Casp3-mediated cleavage of p21 (or p21 <sub>p</sub> )                                                                                                                        |
| $K_{C3}$    | 0.3 $\mu$ M | Hill constant of Casp-3-dependent cleavage of p21 (or p21 <sub>p</sub> )                                                                                                                           |
| $d_{Bax}$   | 0.1 /h      | Half-life of Bax is about 9-12 h <sup>87</sup>                                                                                                                                                     |
| $d_{Cyt c}$ | 0.14 /h     | Half-life of cytosolic Cyt <i>c</i> is about 5 h <sup>88</sup>                                                                                                                                     |
| $d_{Apaf1}$ | 0.7 /h      | Under the conditions of apoptosis and caspases activation, the half-life of Apaf-1 is about 60 min <sup>89</sup>                                                                                   |
| $d_{C-A}$   | 3 /h        | Rate constant for the decay of functional Cyt <i>c</i> -Apaf-1 dimer; its value is relatively great because the aggregation of the dimer into inactive complex is taken into account <sup>18</sup> |
| $d_{Apop}$  | 0.05 /h     | Rate constant for disruption of the apoptosome                                                                                                                                                     |
| $d_{Pro9}$  | 0.15 /h     | Assumed to be comparable with $d_{C9}$                                                                                                                                                             |
| $d_{C9}$    | 0.12 /h     | Half-life of Casp9 is about 6 h <sup>90</sup>                                                                                                                                                      |
| $d_{Pro3}$  | 0.15 /h     | Half-life of Pro3 is about 5.5 h <sup>91</sup>                                                                                                                                                     |
| $d_{C3}$    | 0.4 /h      | Rate constant for the degradation of Casp3 is 0.3-0.6 according to the half-life of Casp3 <sup>92,93</sup>                                                                                         |

## Methods of parameter estimation

Parameter estimation is based on the following principles:

- 1) Based on the published theoretical/experimental studies; e.g. the ratio of ARF activated by ectopic E2F to that activated by normal E2F.
- 2) To ensure a proper timescale for certain reaction process; e.g. the activation time for cyclins and E2F.
- 3) To ensure a proper steady-state level, we can estimate the range of synthesis rate of a protein based on its experimentally measured degradation rate or half-life.

4) For reversible reactions, such as phosphorylation/dephosphorylation and association/disassociation, only the relative strength of two opposite reactions makes sense in determining the eventual results; so we can estimate the reaction rate in one direction based on that in the opposite direction.

### III. SI Appendix Results

#### 1. Effect of E1A on the expression of cyclins

It is obvious that E1A only affects the expression of cyclin E, with the expression of cyclin D unchanged (Fig. S2A).

#### 2. Dissecting the biphasic dynamics of E2F activation

*The first rapid phase corresponds to E1A-mediated RB blockage and E2F release.* First, free RB is completely exhausted before the rapid-to-slow transition point (Fig. S2B). At this time point all E2F is free from RB inhibition and all free RB is blocked by E1A. Moreover, the expression rates of E2F's target genes hardly affect the accumulation rate of E2F in the first rapid phase, but affect that in the second slow phase (Fig. S2C).

*The second slow phase is mainly determined by the transcriptional activity of E2F and E1A/RB-mediated inhibition of E2F degradation.* To figure out the role for E2F's transcriptional activity in the second phase, we set several 'restriction points' around the rapid-to-slow transition point ( $t=3, 3.5, 4, 5, 10$  h); i.e., the transcription rates of E2F's target genes are constrained at constant values after the selected time points, equaling their values at 'restriction points' or the saturation levels when E2F is fully activated. We found that the transcription rates determine both the accumulation rate and eventual E2F levels in the second phase (Fig. S2C, left). Particularly, if the 'restriction point' is set too early, those transcription rates take low values, and thus the E2F level does not rise anymore after the completion of the first phase.

Based on these results, we selected three typical instances, i.e.,  $t=4, 5, 10$  h, for further analysis (Fig. S2C, right). The normalized results indicate that the timescale of the second phase is almost independent of the transcriptional activity of E2F towards its target genes, but is mainly determined by the mechanisms such as degradation inhibition, i.e., E1A/RB-mediated inhibition of E2F degradation.

In brief, the process of E2F activation consists of two phases: the first rapid phase is determined by the E1A-RB interaction, so E2F is rapidly released from RB's inhibition; the second slow phase is mainly determined by the transcriptional activity of E2F and its inhibited degradation mediated by E1A/RB. Specifically, the former dictates the accumulation rate and eventual level of E2F, while the latter determines the timescale of E2F activation in the second phase.

#### 3. Relative strength of Akt versus ARF expression determines p53 levels

As shown in Fig. S2D, the data points with the same p53 level lie on lines along the direction of the

positive diagonal of [ARF]-[Akt] plane, with the slope of the lines corresponding to the relative strength of Akt versus ARF. This indicates that the p53 level is determined by the relative strength of Akt versus ARF. The blue region represents the inactive states of p53, where the impact of Akt surpasses that of ARF. The contributions of Akt and ARF are comparable in the green and yellow regions, where p53 remains at moderate levels and most likely induces cell-cycle arrest. The red region is an ARF-dominated region and corresponds to high levels of p53.

#### 4. Dynamics of key components in response to serum starvation and recovery

To advance the understanding of caspase-3 activation when the cell is exposed to serum starvation and recovery, we show the dynamics of key components under various conditions in [Figs. S6 and S7](#). An interpretation in terms of activation of two positive feedback loops in the apoptosis induction module is presented as follows.

The re-addition of 3% serum will lead to upregulation of phosphorylated Akt, which induces a significant increase in phosphorylated p21 ( $p21_p$ ). The majority of procaspase-3 will complex with  $p21_p$ , and thus only a small amount of caspase-3 can be produced, which fails to trigger the amplification of Cyt *c* release, unless enough Cyt *c* has been released before serum recovery. Thus,  $T_0$  should be so large that Bax and Cyt *c* have accumulated enough. If  $T$  approaches  $T_0$  (from below), caspase-3 is not activated due to insufficient procaspase-3, and p21 predominates in the interaction between p21 and caspase-3. If  $T > T_0$ , Cyt *c* has accumulated to such a level that caspase-3 is continuously produced, which in turn mediates the amplification of Cyt *c* release. Active caspase-3 dominates the double-negative interaction between caspase-3 and p21 and cleaves p21.

For  $C=8\%$ , much more phosphorylated Akt will be induced after serum recovery, leading to a remarkable decrease in p53 and Bax. Then, the p21 and procaspase-3 levels will drop and elevate markedly, respectively. Thus, a relatively small amount of Cyt *c* can facilitate the conversion from procaspase-3 to caspase-3, indicating a shorter starvation period is sufficient for apoptosis induction. If  $T < T_0$ ,  $p21_p$  first complexes with procaspase-3 upon serum re-addition, leading to a sharp decrease in free procaspase-3. Later, p21 drops and procaspase-3 rises. However, Cyt *c* is too little to maintain the accumulation of caspase-3, and the positive feedback involved in Cyt *c* release is not triggered. If  $T > T_0$ , Cyt *c* and other pro-apoptotic components can accumulate sufficiently to trigger the positive feedback. Nevertheless, it takes a long time for the re-accumulation of procaspase-3; since Bax remains at low levels, the accumulation of Cyt *c*, caspase-9 and A-Casp9 is slowed down. All these render the full activation of caspase-3 markedly delayed.

#### 5. Parameter sensitivity analysis

To check whether the main conclusions drawn in this work hold true generally, we plot the

bifurcation diagram of [caspase-3] for different parameter values when p53 acts in the bistability mode. On each trial, only one parameter is increased or decrease by 10% with respect to its default value, while the others are the same as those in the rightmost panel of Fig. S4C. For most parameters, the bifurcation diagrams are similar to Fig. S8A (Fig. S9A). For 19 out of 119 parameters, the bifurcation diagrams may change qualitatively when the value varies by 10%, as seen in Fig. S9B. Those parameters are  $n_2$ ,  $n_5$ ,  $k_{E\_E}$ ,  $d_{E2F}$ ,  $k_{p53}$ ,  $k_{p\_M}$ ,  $k_{M\_S}$ ,  $k_{Dp4}$ ,  $k_{21\_p}$ ,  $K_{21\_p}$ ,  $k_{p\_21}$ ,  $K_{Akt\_p21}$ ,  $k_{C3}$ ,  $k_{C9\_E}$ ,  $k_{C3\_E}$ ,  $K_{C3}$ ,  $k_{21P}$ ,  $K_{AC9}$ , and  $d_{C3}$ , which are mostly related to the regulation of caspase-3, caspase-9, and p21 activities. Nevertheless, only parts of the unstable steady states change markedly, and the stable steady states vary slightly. Accordingly, the  $T_0$ - $C$  and  $Fc$ - $C$  curves are similar to those in Fig. 5C (Fig. S9C), and the temporal evolution of p53, p21 and caspase-3 levels is also similar to that in Fig. 4 (Fig. S9D). Therefore, our main conclusions are insensitive to parameter variations in a limited range.





suppressor that dampens Akt activation by dephosphorylating PIP3. The ARF protein interacts with MDM2 and blocks its E3 ligase activity toward p53. (D) The module of apoptosis induction mediated by E2F1 and p53. See *Method S1* for details.

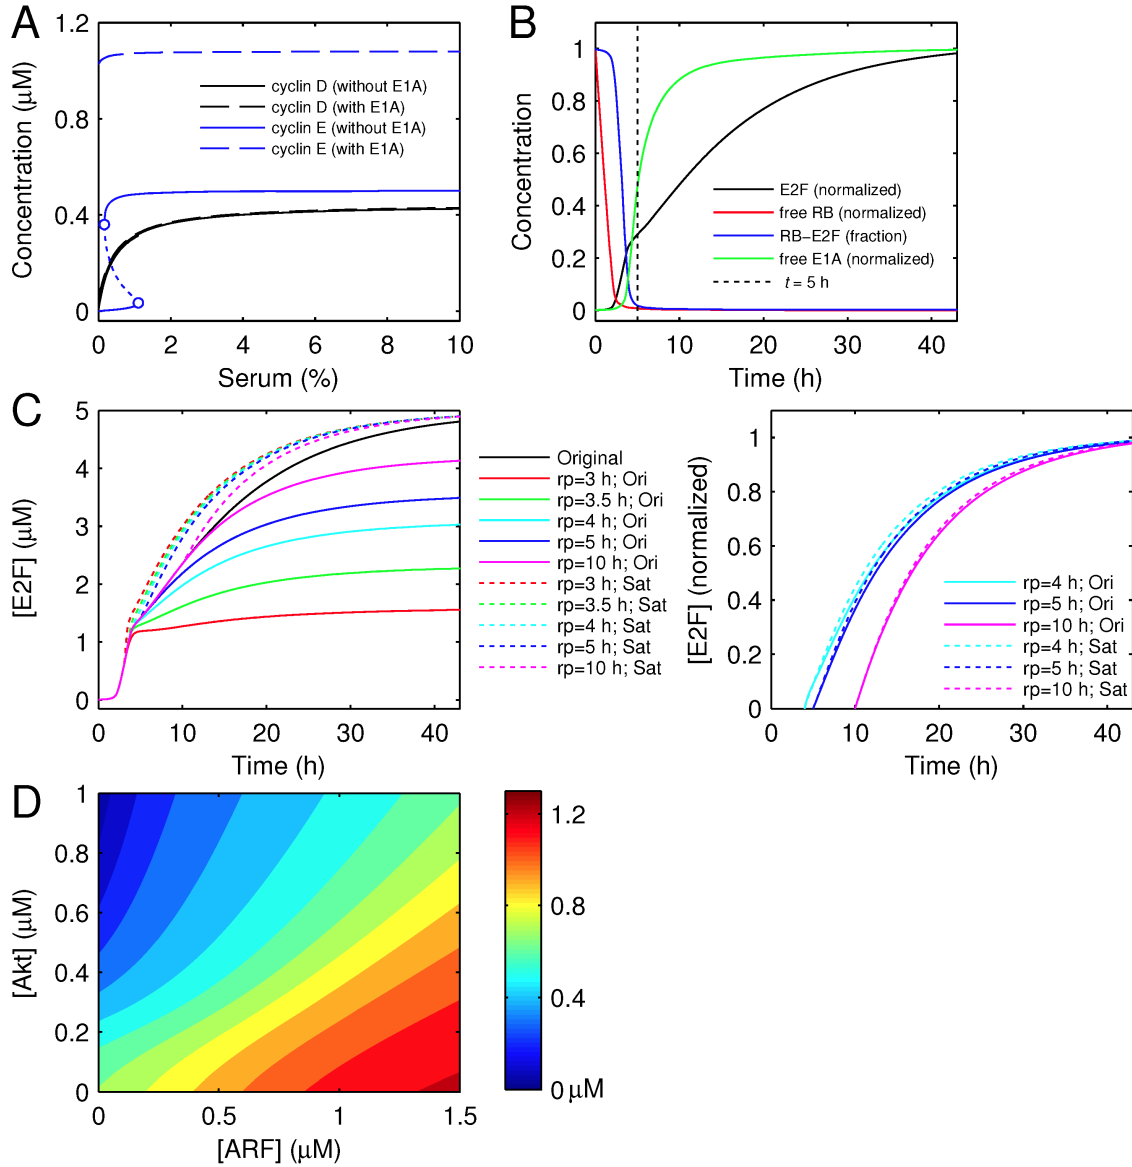

**Figure S2: Dynamics of cyclins and effects of ARF and Akt on p53 levels.**

(A) Responses of cyclins to serum stimulation with or without E1A expression. The steady-state levels of cyclin D and cyclin E as a function of serum concentration are presented. (B) Temporal responses of the concentrations of free RB (normalized), RB-E2F complex (divided by the total E2F level), free E1A (normalized) and active E2F (normalized). The dashed line roughly corresponds to the transition from the rapid to slow phase of E2F activation. (C) Dependence of E2F activation on the transcriptional activity of E2F, especially after the rapid-to-slow transition point. We interfere with E2F activation by controlling the rates of

E2F-dependent gene expression; several time points around the transition point are selected for interference (i.e.  $t=3, 3.5, 4, 5$  or  $10$  h, termed restriction point (rp) hereafter), and the corresponding expression items are set to be constant after these time points, either taking their original values at the restriction points (represented by solid lines) or equaling their saturation levels at  $t=50$  h (dashed lines). The left panel shows the time courses of E2F levels, while the right panel shows the temporal evolution of normalized E2F levels after the restriction points. (D) Dependence of the steady-state level of p53 on Akt and ARF levels, which are independent inputs. The color box denotes the value of [p53].

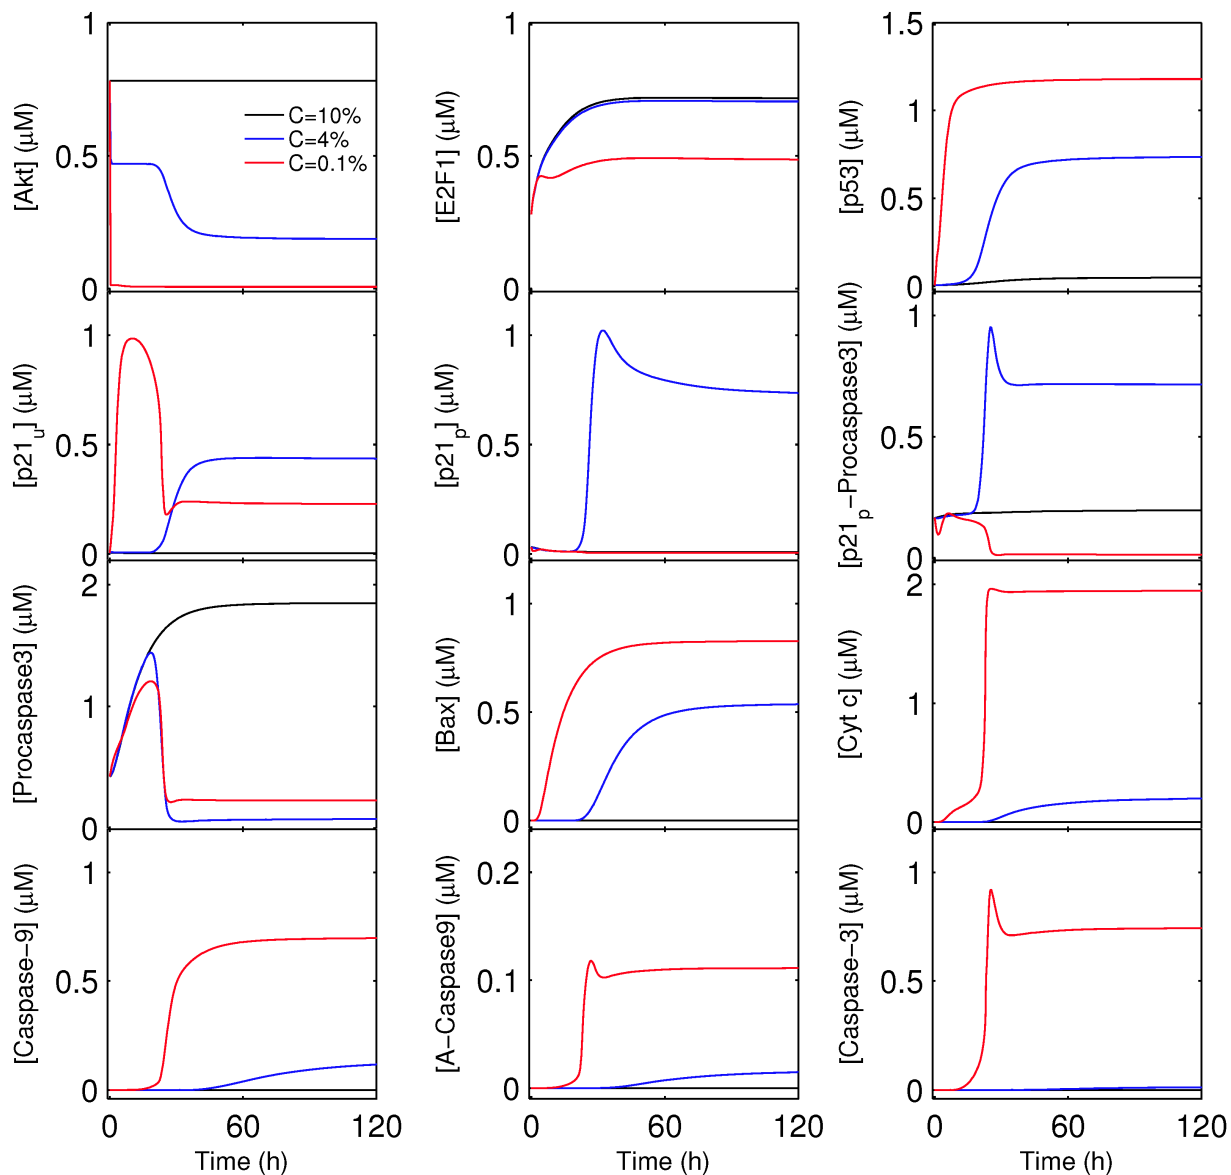

**Figure S3: Temporal evolution of key proteins involved in apoptosis induction.**

Time courses of proteins for  $C=0.1\%$ ,  $4\%$ , or  $10\%$ .

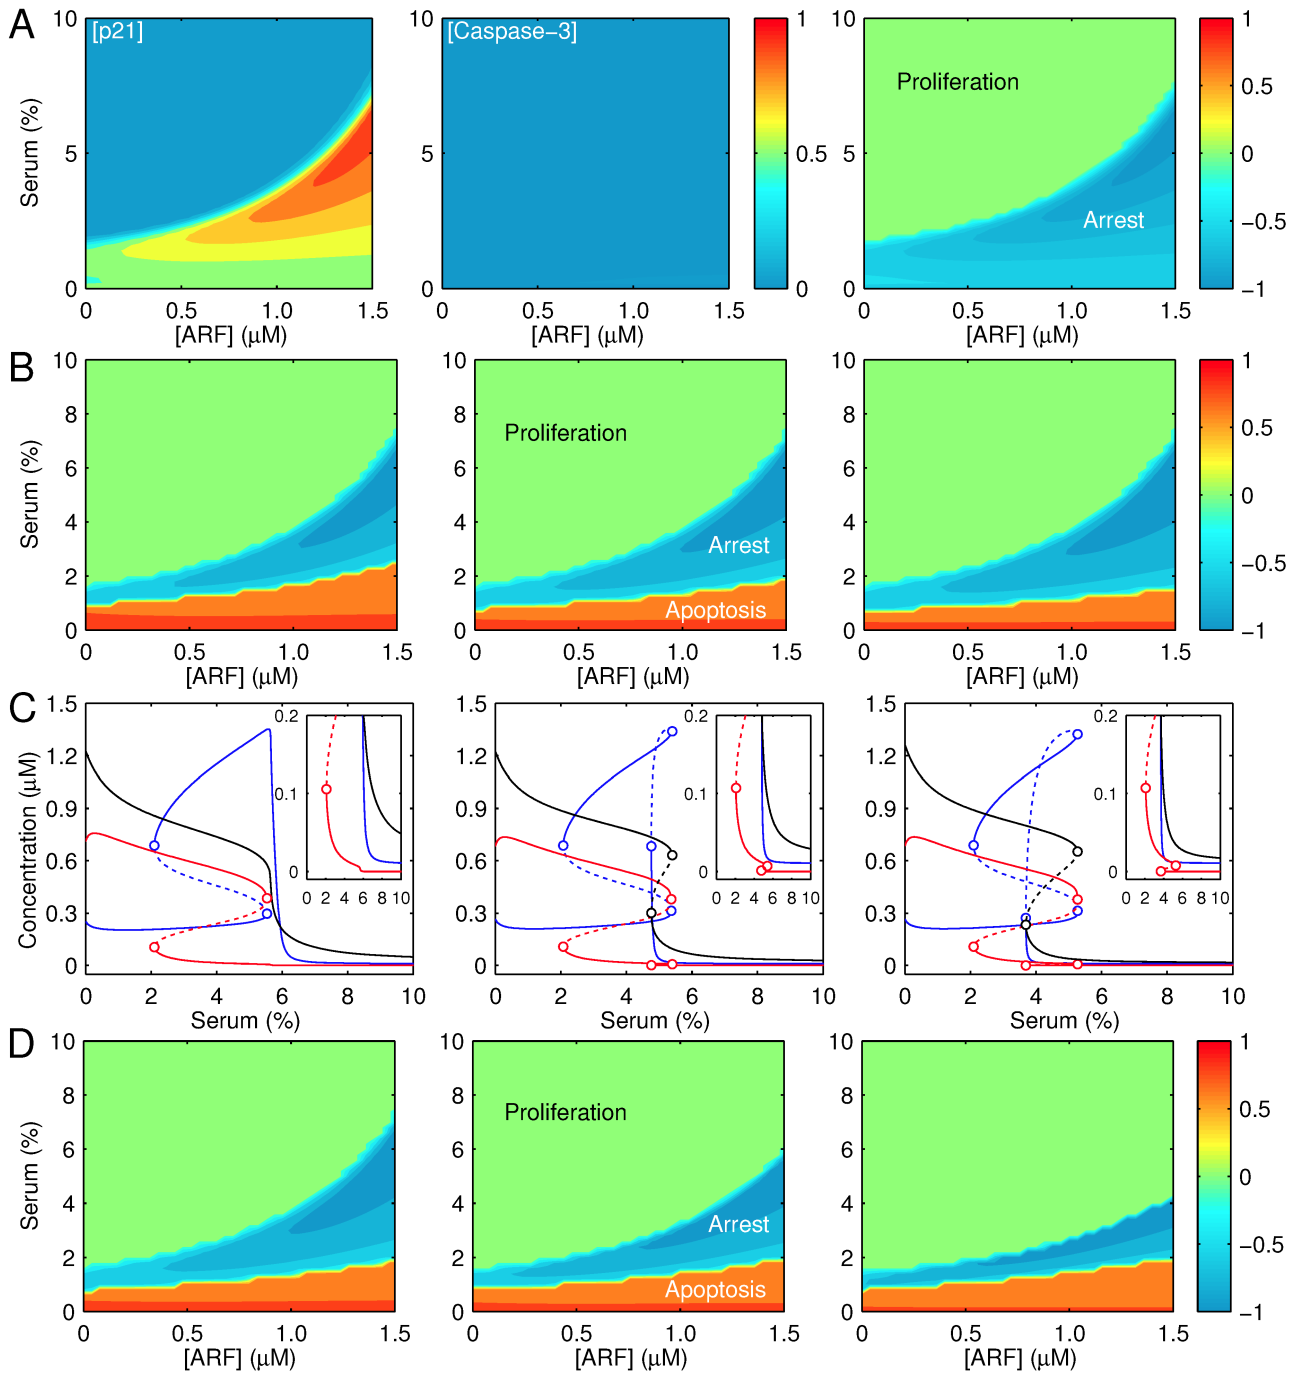

**Figure S4: Factors that affect cellular outcome.**

(A) Protein expression and cell-fate distribution with ARF overexpression. Without E1A expression, the dependence of steady-state levels of p21 (*left*) and caspase-3 (*middle*) on ARF and serum concentrations, which are changed independently. [p21] is normalized by its maximum, while [Caspase-3] is normalized by the maximum of [Caspase-3] in Fig. 3B (i.e., 0.844  $\mu\text{M}$ ). Subtracting the p21 level from the caspase-3 level gets a new plot, showing the distribution of cell fate (*right*). (B) The inhibitory effect of p21<sub>p</sub>-Pro3 interaction on apoptosis induction. The same notation as in the *rightmost* plot in panel A. Compared with the middle

panel (with the default parameter values), the rate constant for p21<sub>p</sub>/Pro3 association ( $k_{21p}$ ) is decreased (*left*) or increased (*right*) by 25%. **(C)** Bifurcation diagrams of the steady-state levels of p21 (*blue*), caspase-3 (*red*) and p53 (*black*) for different modes of p53. For panels from left to right, the bistability domain of p53 expands with different sets of parameter values. **Left:**  $k_{M_p}=0.33$ ,  $K_{M_p}=0.5$ ,  $n_1=4$ ,  $k_{MD_S}=0.66$ ,  $K_{MD_S}=0.45$ ,  $K_{M_p}=0.081$ ,  $K_{Akt_M}=0.5$ ,  $k_{DP4}=12$ ,  $k_{p_M}=56$ ,  $k_{DP3}=9.6$ ,  $K_{Akt}=0.2$ ,  $k_{C3}=3$ ,  $k_{REE1}=60$ ,  $d_{REE1}=0.065$ ; **middle:**  $k_{M_p}=0.33$ ,  $K_{M_p}=0.5$ ,  $n_1=4$ ,  $k_{MD_S}=0.66$ ,  $K_{MD_S}=0.45$ ,  $K_{M_p}=0.04$ ,  $K_{Akt_M}=0.5$ ,  $k_{DP4}=15$ ,  $k_{p_M}=90$ ,  $k_{DP3}=9.6$ ,  $K_{Akt}=0.2$ ,  $k_{C3}=3$ ,  $k_{REE1}=100$ ,  $d_{REE1}=0.08$ ; **right:**  $k_{M_p}=0.25$ ,  $K_{M_p}=0.6$ ,  $n_1=3$ ,  $k_{MD_S}=0.77$ ,  $K_{MD_S}=0.45$ ,  $K_{M_p}=0.04$ ,  $K_{Akt_M}=0.5$ ,  $k_{DP4}=15$ ,  $k_{p_M}=90$ ,  $k_{DP3}=9.6$ ,  $K_{Akt}=0.2$ ,  $k_{C3}=3$ ,  $k_{REE1}=80$ ,  $d_{REE1}=0.08$ . An enlarged view of each plot is shown in the inset. **(D)** Impact of the kinetic mode of p53 on cellular outcome. The same notation as in panel B and the same parameters as in panel C are taken here.

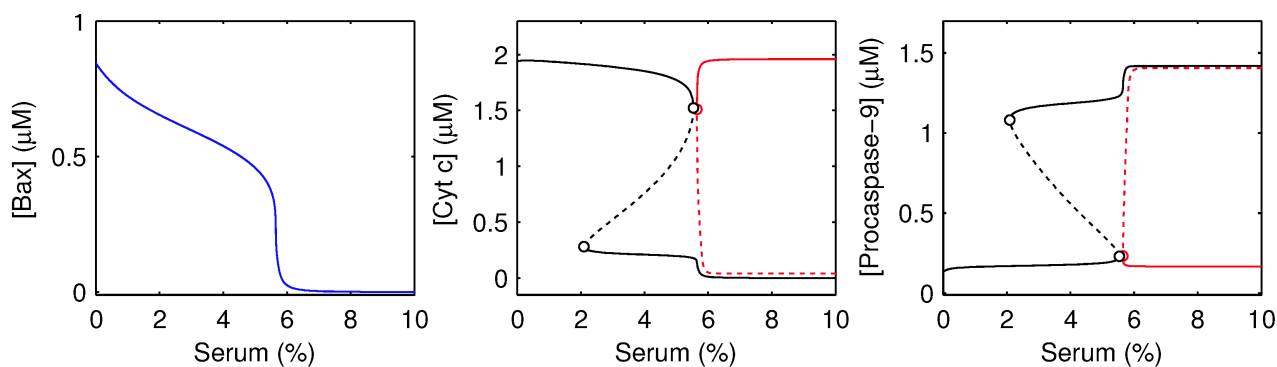

**Figure S5: Bifurcation diagrams of steady-state levels of proapoptotic proteins.**

The steady-state levels of Bax, Cyt *c* and procaspase-9 are presented. The red curves denote the novel branch. The same parameter values as in Fig. 5C.

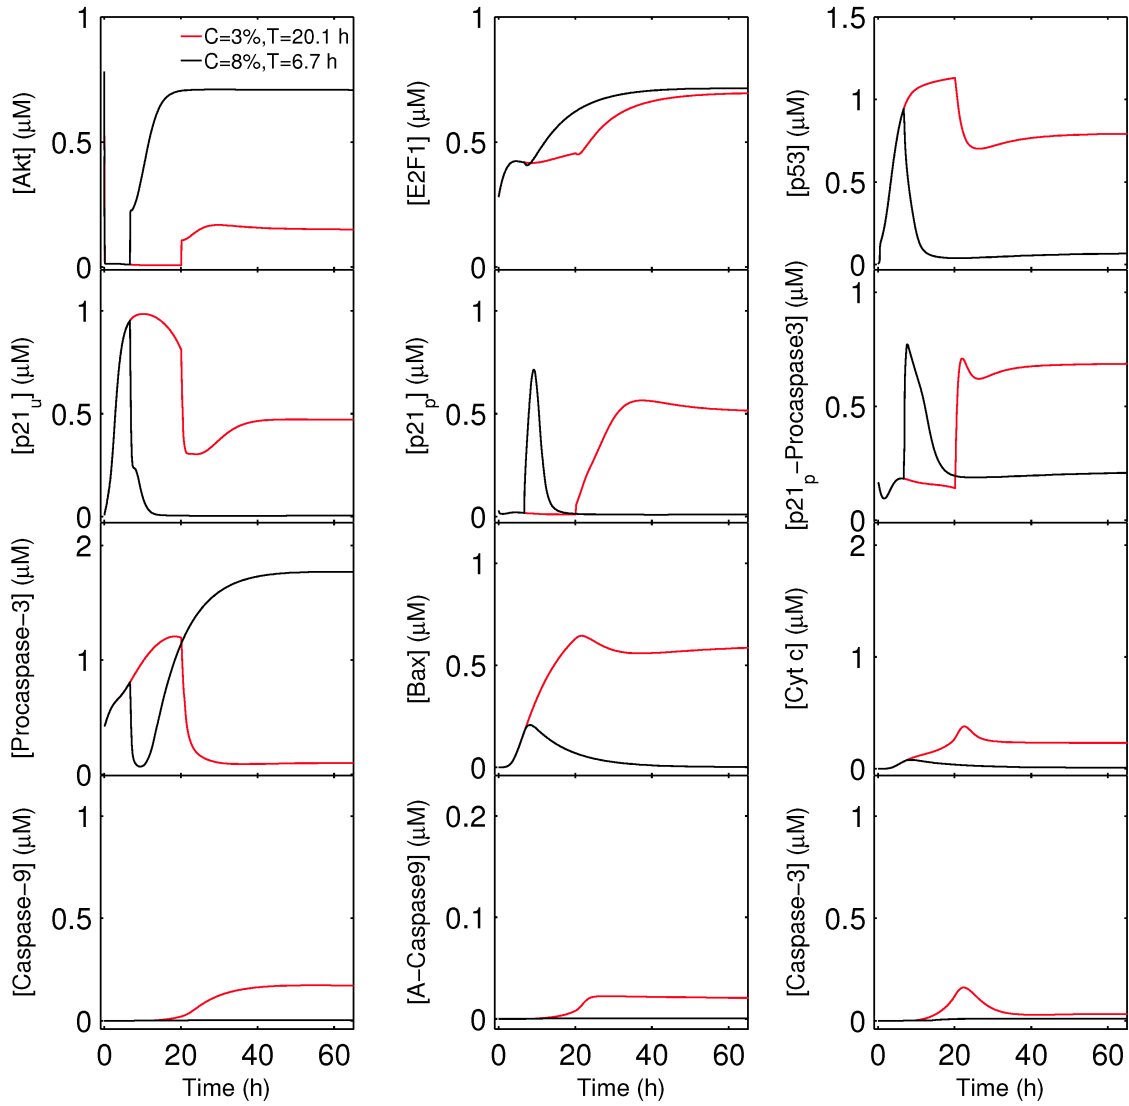

**Figure S6: Temporal evolution of key proteins in response to serum starvation and recovery.**

The cell is first kept in a serum-free medium for a period of  $T$  and then is exposed to 3% (red) or 8% (black) serum.  $T$  is smaller than  $T_0$ , and the cell undergoes cell-cycle arrest or proliferation. The same parameter values as in Fig. 5C. See also the discussion on p. 30.

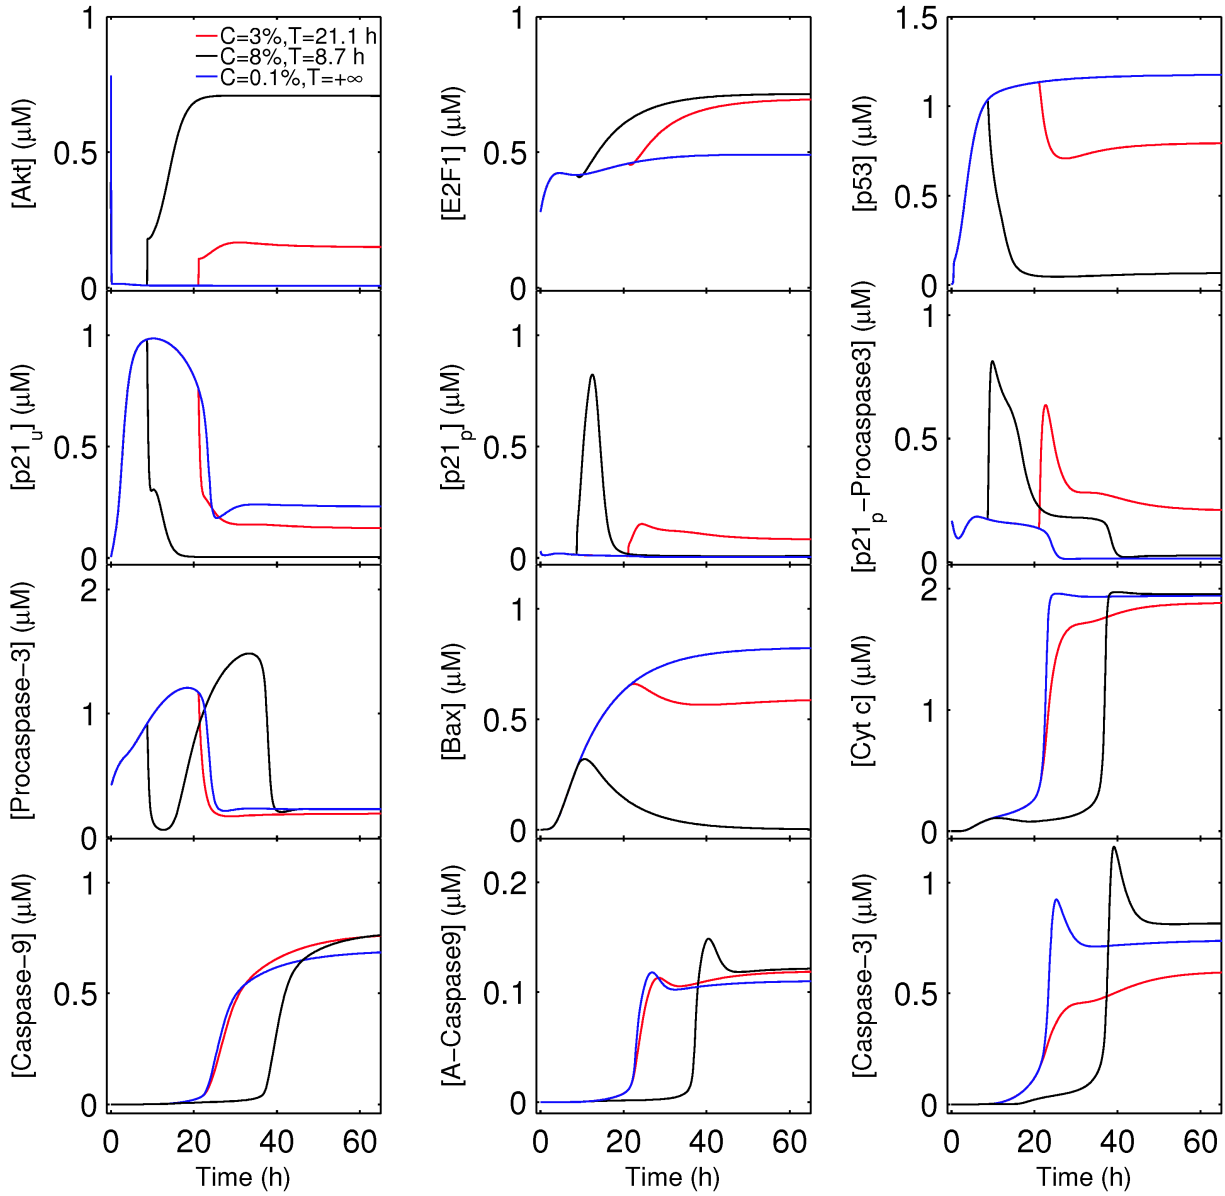

**Figure S7: Temporal evolution of key proteins involved in apoptosis induction.**

The cell is first kept in a serum-free medium for a period of  $T$  and then is exposed to 3% (red) or 8% (black) serum.  $T$  is larger than  $T_0$ , and the cell commits apoptosis. For comparison, the cellular response to 0.1% serum is also shown (*blue*). The same parameter values as in Fig. 5C. See also the discussion on p. 30.

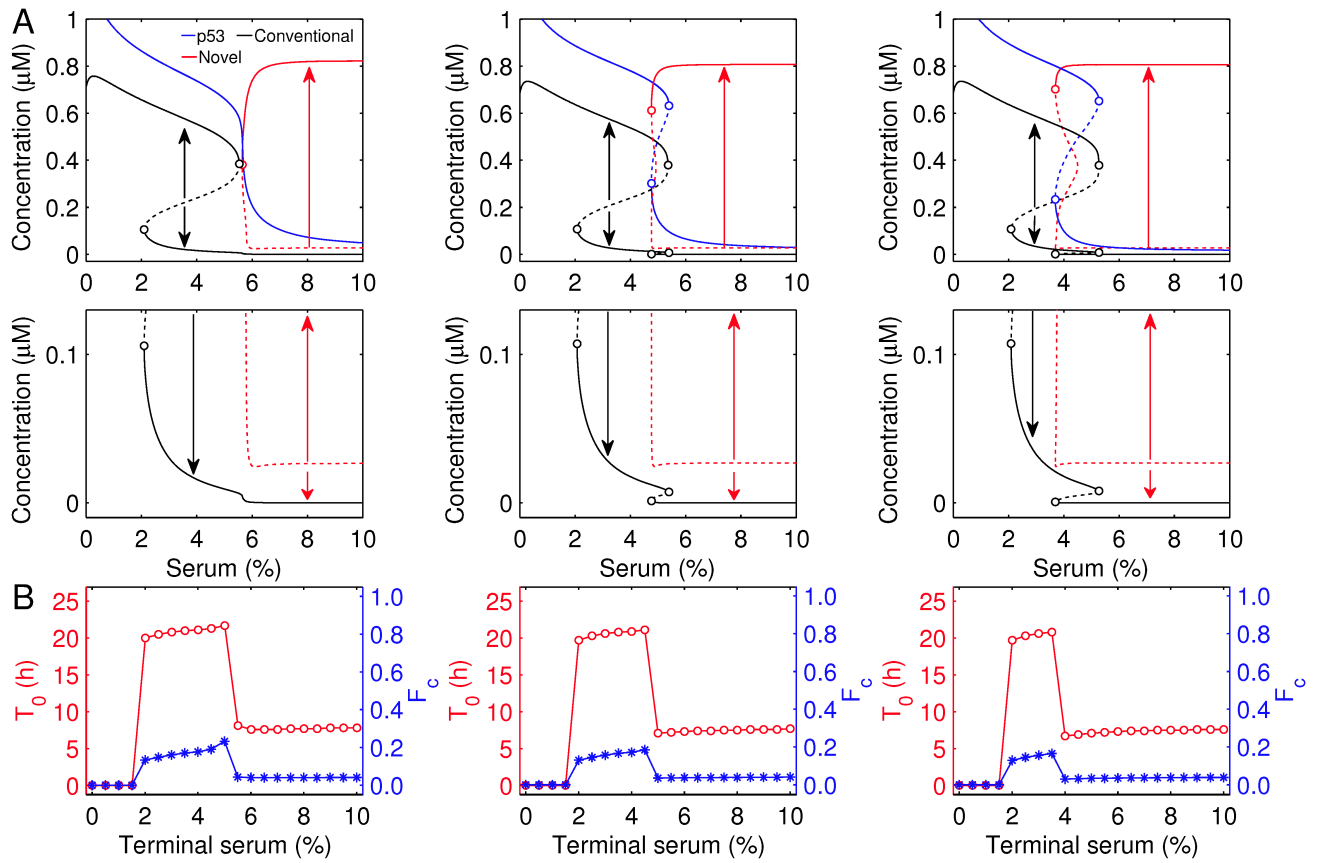

**Figure S8: Dependence of the bifurcation diagrams and  $T_0$ -C and  $F_C$ -C curves on p53 mode.**

(A) Full bifurcation diagrams of [Caspase-3] and [p53]. From left to right, the p53 mode changes from ultrasensitivity to bistability. The arrows denote the change in [Caspase-3] when its initial value is around an unstable steady-state level. An enlarged view of each plot is shown in the bottom row. (B) Dependence of the  $T_0$ -C (red) and  $F_C$ -C (blue) curves on the p53 mode. The same parameter values are taken as in Fig. S4C.

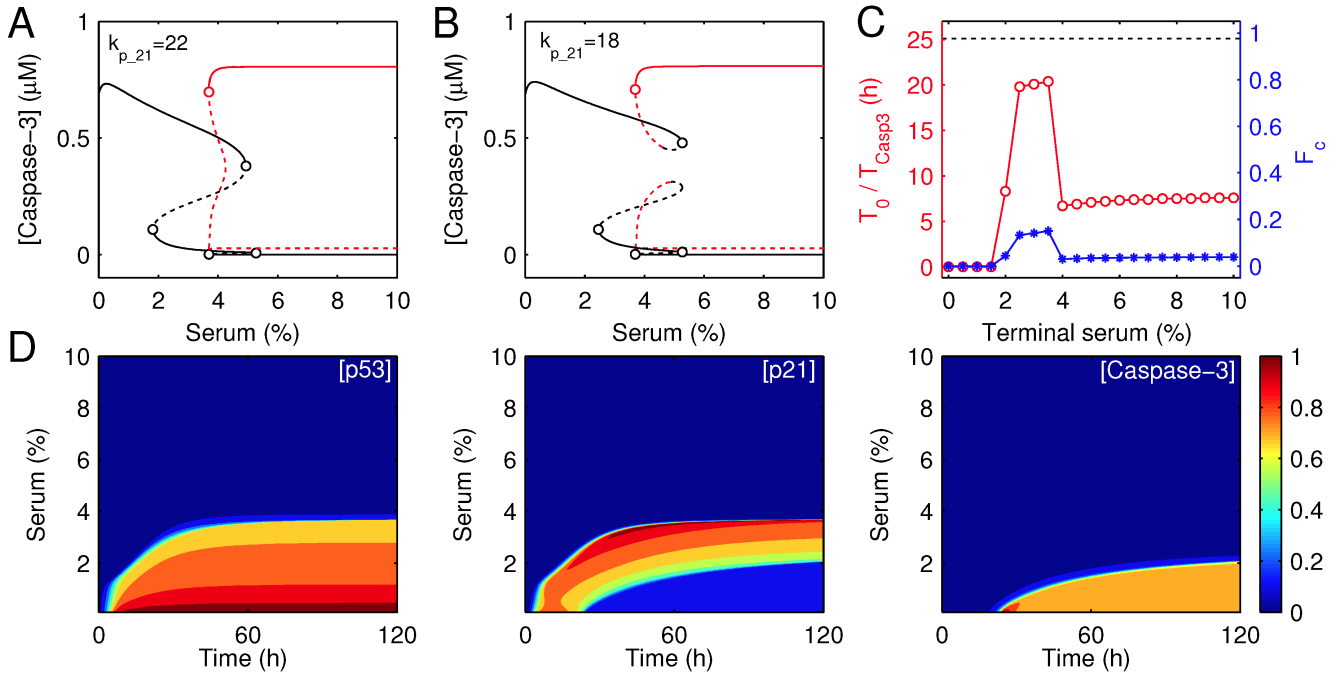

**Figure S9: Parameter sensitivity analysis.**

The bifurcation diagram of [Caspase-3] for  $k_{p_21}=22$  (**A**) or 18 (**B**); the other parameters are the same as those in the rightmost panel of Fig. S4C. (**C**) The  $T_0$ -C (red) and  $F_C$ -C (blue) curves for  $k_{p_21}=18$ . The other parameters are the same as those in the rightmost panel of Fig. S4C. The same notation and simulation protocol as in Fig. 5C. (**D**) Temporal evolution of p53, p21 and caspase-3 levels. The same parameter values as in panel C. See also the discussion on p.30-31.



## V. References

- 1 Yao G, Lee TJ, Mori S, Nevins JR, You L. A bistable Rb-E2F switch underlies the restriction point. *Nat Cell Biol* **10**, 476-482 (2008).
- 2 Ianari A, *et al.* Proapoptotic function of the retinoblastoma tumor suppressor protein. *Cancer Cell* **15**, 184-194 (2009).
- 3 Seifried LA, *et al.* pRB-E2F1 complexes are resistant to adenovirus E1A-mediated disruption. *J Virol* **82**, 4511-4520 (2008).
- 4 Cecchini MJ, Dick FA. The biochemical basis of CDK phosphorylation-independent regulation of E2F1 by the retinoblastoma protein. *Biochem J* **434**, 297-308 (2011).
- 5 Hofmann F, Martelli F, Livingston DM, Wang Z. The retinoblastoma gene product protects E2F-1 from degradation by the ubiquitin-proteasome pathway. *Genes Dev* **10**, 2949-2959 (1996).
- 6 Hateboer G, Kerkhoven RM, Shvarts A, Bernards R, Beijersbergen RL. Degradation of E2F by the ubiquitin-proteasome pathway: regulation by retinoblastoma family proteins and adenovirus transforming proteins. *Genes Dev* **10**, 2960-2970 (1996).
- 7 Pelka P, *et al.* Adenovirus E1A directly targets the E2F/DP-1 complex. *J Virol* **85**, 8841-8851 (2011).
- 8 Green M, Panesar NK, Loewenstein PM. Adenovirus E1A proteins are closely associated with chromatin in productively infected and transformed cells. *Virology* **371**, 1-7 (2008).
- 9 Heilmann AM, Dyson NJ. Phosphorylation puts the pRb tumor suppressor into shape. *Genes Dev* **26**, 1128-1130 (2012).
- 10 Ries S, *et al.* Opposing effects of Ras on p53: transcriptional activation of *mdm2* and induction of p19<sup>ARF</sup>. *Cell* **103**, 321-330 (2000).
- 11 Stambolic V, *et al.* Regulation of PTEN transcription by p53. *Mol Cell* **8**, 317-325 (2001).
- 12 Manning BD, Cantley LC. AKT/PKB signaling: navigating downstream. *Cell* **129**, 1261-1274 (2007).
- 13 Zhou BP, *et al.* HER-2/*neu* induces p53 ubiquitination via Akt-mediated MDM2 phosphorylation. *Nat Cell Biol* **3**, 973-982 (2001).
- 14 Chipuk JE, *et al.* Direct activation of Bax by p53 mediates mitochondrial membrane permeabilization and apoptosis. *Science* **303**, 1010-1014 (2004).
- 15 Kuwana T, *et al.* Bid, Bax, and lipids cooperate to form supramolecular openings in the outer mitochondrial membrane. *Cell* **111**, 331-342 (2002).
- 16 Eskes R, Desagher S, Antonsson B, Martinou JC. Bid induces the oligomerization and

- insertion of Bax into the outer mitochondrial membrane. *Mol Cell Biol* **20**, 929-935 (2000).
- 17 Jürgensmeier JM, *et al.* Bax directly induces release of cytochrome c from isolated mitochondria. *Proc Natl Acad Sci USA* **95**, 4997-5002 (1998).
- 18 Kim HE, Du F, Fang M, Wang X. Formation of apoptosome is initiated by cytochrome c-induced dATP hydrolysis and subsequent nucleotide exchange on Apaf-1. *Proc Natl Acad Sci USA* **102**, 17545-17550 (2005).
- 19 Zou H, Li Y, Liu X, Wang X. An APAF-1·cytochrome c multimeric complex is a functional apoptosome that activates procaspase-9. *J Biol Chem* **274**, 11549-11556 (1999).
- 20 Bratton SB, Salvesen GS. Regulation of the Apaf-1–caspase-9 apoptosome. *J Cell Sci* **123**, 3209-3214 (2010).
- 21 Malladi S, Challa-Malladi M, Fearnhead HO, Bratton SB. The Apaf-1•procaspase-9 apoptosome complex functions as a proteolytic-based molecular timer. *EMBO J* **28**, 1916-1925 (2009).
- 22 Nahle Z, *et al.* Direct coupling of the cell cycle and cell death machinery by E2F. *Nat Cell Biol* **4**, 859-864 (2002).
- 23 Miyashita T, Reed JC. Tumor suppressor p53 is a direct transcriptional activator of the human *bax* gene. *Cell* **80**, 293-299 (1995).
- 24 Bagci E, Vodovotz Y, Billiar TR, Ermentrout GB, Bahar I. Bistability in apoptosis: roles of Bax, Bcl-2, and mitochondrial permeability transition pores. *Biophys J* **90**, 1546-1559 (2006).
- 25 Legewie S, Blüthgen N, Herzog H. Mathematical modeling identifies inhibitors of apoptosis as mediators of positive feedback and bistability. *PLoS Comput Biol* **2**, e120 (2006).
- 26 Spencer SL, Sorger PK. Measuring and modeling apoptosis in single cells. *Cell* **144**, 926-939 (2011).
- 27 Milojkovic A, *et al.* p14<sup>ARF</sup> induces apoptosis via an entirely caspase-3–dependent mitochondrial amplification loop. *Int J Cancer* **133**, 2551-2562 (2013).
- 28 Sherr CJ. Ink4–Arf locus in cancer and aging. *Wiley Interdiscip Rev Dev Biol* **1**, 731-741 (2012).
- 29 Komori H, Enomoto M, Nakamura M, Iwanaga R, Ohtani K. Distinct E2F–mediated transcriptional program regulates *p14<sup>ARF</sup>* gene expression. *EMBO J* **24**, 3724-3736 (2005).
- 30 Iaquinta PJ, Aslanian A, Lees JA. Regulation of the *Arf/p53* tumor surveillance network by E2F. *Cold Spring Harbor Symp Quant Biol* **70**, 309-316 (2005).
- 31 Aslanian A, Iaquinta PJ, Verona R, Lees JA. Repression of the Arf tumor suppressor by E2F3 is required for normal cell cycle kinetics. *Genes Dev* **18**, 1413-1422 (2004).
- 32 Jacobs JJ, *et al.* Bmi-1 collaborates with c-Myc in tumorigenesis by inhibiting c-Myc-induced

- apoptosis via INK4a/ARF. *Genes Dev* **13**, 2678-2690 (1999).
- 33 Berk AJ. Recent lessons in gene expression, cell cycle control, and cell biology from adenovirus. *Oncogene* **24**, 7673-7685 (2005).
- 34 Nevins JR. E2F: A link between the Rb tumor suppressor protein and viral oncoproteins. *Science* **258**, 424-429 (1992).
- 35 Whyte P, Williamson NM, Harlow E. Cellular targets for transformation by the adenovirus E1A proteins. *Cell* **56**, 67-75 (1989).
- 36 El-Deiry WS, *et al.* WAF1, a potential mediator of p53 tumor suppression. *Cell* **75**, 817-825 (1993).
- 37 El-Deiry WS, *et al.* WAF1/CIP1 is induced in p53-mediated G1 arrest and apoptosis. *Cancer Res* **54**, 1169-1174 (1994).
- 38 Harper JW, Adami GR, Wei N, Keyomarsi K, Elledge SJ. The p21 Cdk-interacting protein Cip1 is a potent inhibitor of G1 cyclin-dependent kinases. *Cell* **75**, 805-816 (1993).
- 39 Chellappan SP, Hiebert S, Mudryj M, Horowitz JM, Nevins JR. The E2F transcription factor is a cellular target for the RB protein. *Cell* **65**, 1053-1061 (1991).
- 40 Helin K. Regulation of cell proliferation by the E2F transcription factors. *Curr Opin Genet Dev* **8**, 28-35 (1998).
- 41 Hermeking H, *et al.* 14-3-3 $\sigma$  is a p53-regulated inhibitor of G2/M progression. *Mol Cell* **1**, 3-11 (1997).
- 42 Bunz F, *et al.* Requirement for p53 and p21 to sustain G2 arrest after DNA damage. *Science* **282**, 1497-1501 (1998).
- 43 Chan TA, Hwang PM, Hermeking H, Kinzler KW, Vogelstein B. Cooperative effects of genes controlling the G2/M checkpoint. *Genes Dev* **14**, 1584-1588 (2000).
- 44 Taylor WR, Stark GR. Regulation of the G2/M transition by p53. *Oncogene* **20**, 1803-1815 (2001).
- 45 Polager S, Ginsberg D. p53 and E2f: partners in life and death. *Nat Rev Cancer* **9**, 738-748 (2009).
- 46 Wu X, Levine AJ. p53 and E2F-1 cooperate to mediate apoptosis. *Proc Natl Acad Sci USA* **91**, 3602-3606 (1994).
- 47 Hershko T, Ginsberg D. Up-regulation of Bcl-2 homology 3 (BH3)-only proteins by E2F1 mediates apoptosis. *J Biol Chem* **279**, 8627-8634 (2004).
- 48 Moroni MC, *et al.* Apaf-1 is a transcriptional target for E2F and p53. *Nat Cell Biol* **3**, 552-558 (2001).
- 49 Nakano K, Vousden KH. PUMA, a novel proapoptotic gene, is induced by p53. *Mol Cell* **7**,

- 683-694 (2001).
- 50 Miyashita T, *et al.* Tumor suppressor p53 is a regulator of bcl-2 and bax gene expression in vitro and in vivo. *Oncogene* **9**, 1799-1805 (1994).
- 51 Miyashita T, Harigai M, Hanada M, Reed JC. Identification of a p53-dependent negative response element in the bcl-2 gene. *Cancer Res* **54**, 3131-3135 (1994).
- 52 Croxton R, Ma Y, Song L, Haura EB, Cress WD. Direct repression of the Mcl-1 promoter by E2F1. *Oncogene* **21**, 1359-1369 (2002).
- 53 Eischen CM, *et al.* Bcl-2 is an apoptotic target suppressed by both c-Myc and E2F-1. *Oncogene* **20**, 6983-6993 (2001).
- 54 Cantley LC. The phosphoinositide 3-kinase pathway. *Science* **296**, 1655-1657 (2002).
- 55 Datta SR, Brunet A, Greenberg ME. Cellular survival: a play in three Akts. *Genes Dev* **13**, 2905-2927 (1999).
- 56 Zhou BP, *et al.* Cytoplasmic localization of p21<sup>Cip1/WAF1</sup> by Akt-induced phosphorylation in *HER-2/neu*-overexpressing cells. *Nat Cell Biol* **3**, 245-252 (2001).
- 57 Child ES, Mann DJ. The intricacies of p21 phosphorylation: protein/protein interactions, subcellular localization and stability. *Cell Cycle* **5**, 1313-1319 (2006).
- 58 Suzuki A, Tsutomi Y, Akahane K, Araki T, Miura M. Resistance to Fas-mediated apoptosis: activation of Caspase 3 is regulated by cell cycle regulator p21<sup>WAF1</sup> and IAP gene family ILP. *Oncogene* **17**, 931-939 (1998).
- 59 Suzuki A, Tsutomi Y, Miura M, Akahane K. Caspase 3 inactivation to suppress Fas-mediated apoptosis: identification of binding domain with p21 and ILP and inactivation machinery by p21. *Oncogene* **18**, 1239-1244 (1999).
- 60 Ashcroft M, *et al.* Phosphorylation of HDM2 by Akt. *Oncogene* **21**, 1955-1962 (2002).
- 61 Mayo LD, Donner DB. A phosphatidylinositol 3-kinase/Akt pathway promotes translocation of Mdm2 from the cytoplasm to the nucleus. *Proc Natl Acad Sci USA* **98**, 11598-11603 (2001).
- 62 Polyak K, Waldman T, He TC, Kinzler KW, Vogelstein B. Genetic determinants of p53-induced apoptosis and growth arrest. *Genes Dev* **10**, 1945-1952 (1996).
- 63 Gorospe M, *et al.* p21<sup>Waf1/Cip1</sup> protects against p53-mediated apoptosis of human melanoma cells. *Oncogene* **14**, 929-935 (1997).
- 64 Hemmati PG, *et al.* Systematic genetic dissection of p14<sup>ARF</sup>-mediated mitochondrial cell death signaling reveals a key role for p21<sup>CDKN1</sup> and the BH3-only protein Puma/bbc3. *J Mol Med* **88**, 609-622 (2010).
- 65 Hemmati PG, *et al.* Loss of p21 disrupts p14<sup>ARF</sup>-induced G1 cell cycle arrest but augments

- p14<sup>ARF</sup>-induced apoptosis in human carcinoma cells. *Oncogene* **24**, 4114-4128 (2005).
- 66 Gervais JL, Seth P, Zhang H. Cleavage of CDK inhibitor p21<sup>Cip1/Waf1</sup> by caspases is an early event during DNA damage-induced apoptosis. *J Biol Chem* **273**, 19207-19212 (1998).
- 67 Levkau B, *et al.* Cleavage of p21<sup>Cip1/Waf1</sup> and p27<sup>Kip1</sup> mediates apoptosis in endothelial cells through activation of Cdk2: role of a caspase cascade. *Mol Cell* **1**, 553-563 (1998).
- 68 Chen Q, Gong B, Almasan A. Distinct stages of cytochrome c release from mitochondria: evidence for a feedback amplification loop linking caspase activation to mitochondrial dysfunction in genotoxic stress induced apoptosis. *Cell Death Differ* **7**, 227-233 (2000).
- 69 Garrido C, *et al.* Mechanisms of cytochrome c release from mitochondria. *Cell Death Differ* **13**, 1423-1433 (2006).
- 70 Ricci JE, *et al.* Disruption of mitochondrial function during apoptosis is mediated by caspase cleavage of the p75 subunit of complex I of the electron transport chain. *Cell* **117**, 773-786 (2004).
- 71 Zhu Y, *et al.* Caspase cleavage of cytochrome c1 disrupts mitochondrial function and enhances cytochrome c release. *Cell Res* **22**, 127-141 (2012).
- 72 Wee KB, Aguda BD. Akt versus p53 in a network of oncogenes and tumor suppressor genes regulating cell survival and death. *Biophys J* **91**, 857-865 (2006).
- 73 Harrington HA, Ho KL, Ghosh S, Tung KC. Construction and analysis of a modular model of caspase activation in apoptosis. *Theor Biol Med Model* **5**, 26 (2008).
- 74 Nemajerova A, Talos F, Moll UM, Petrenko O. Rb function is required for E1A-induced S-phase checkpoint activation. *Cell Death Differ* **15**, 1440-1449 (2008).
- 75 Kuo ML, den Besten W, Bertwistle D, Roussel MF, Sherr CJ. N-terminal polyubiquitination and degradation of the Arf tumor suppressor. *Genes Dev* **18**, 1862-1874 (2004).
- 76 Chen D, Shan J, Zhu WG, Qin J, Gu W. Transcription-independent ARF regulation in oncogenic stress-mediated p53 responses. *Nature* **464**, 624-627 (2010).
- 77 Zhang Y, Xiong Y, Yarbrough WG. ARF promotes MDM2 degradation and stabilizes p53: ARF-INK4a locus deletion impairs both the Rb and p53 tumor suppression pathways. *Cell* **92**, 725-734 (1998).
- 78 Xirodimas D, Saville MK, Edling C, Lane DP, Lain S. Different effects of p14<sup>ARF</sup> on the levels of ubiquitinated p53 and Mdm2 *in vivo*. *Oncogene* **20**, 4972-4983 (2001).
- 79 Frisch SM, Mymryk JS. Adenovirus-5 E1A: paradox and paradigm. *Nat Rev Mol Cell Biol* **3**, 441-452 (2002).
- 80 Wu X, *et al.* Evidence for regulation of the PTEN tumor suppressor by a membrane-localized multi-PDZ domain containing scaffold protein MAGI-2. *Proc Natl Acad Sci USA* **97**,

- 4233-4238 (2000).
- 81 Xu D, Yao Y, Jiang X, Lu L, Dai W. Regulation of PTEN stability and activity by Plk3. *J Biol Chem* **285**, 39935-39942 (2010).
- 82 Giaccia AJ, Kastan MB. The complexity of p53 modulation: emerging patterns from divergent signals. *Genes Dev* **12**, 2973-2983 (1998).
- 83 Sherr CJ, Weber JD. The ARF/p53 pathway. *Curr Opin Genet Dev* **10**, 94-99 (2000).
- 84 Ma L, *et al.* A plausible model for the digital response of p53 to DNA damage. *Proc Natl Acad Sci USA* **102**, 14266-14271 (2005).
- 85 Maki CG, Howley PM. Ubiquitination of p53 and p21 is differentially affected by ionizing and UV radiation. *Mol Cell Biol* **17**, 355-363 (1997).
- 86 Li Y, Dowbenko D, Lasky LA. AKT/PKB phosphorylation of p21<sup>Cip/WAF1</sup> enhances protein stability of p21<sup>Cip/WAF1</sup> and promotes cell survival. *J Biol Chem* **277**, 11352-11361 (2002).
- 87 Xin M, Deng X. Nicotine inactivation of the proapoptotic function of Bax through phosphorylation. *J Biol Chem* **280**, 10781-10789 (2005).
- 88 Bobba A, *et al.* Early release and subsequent caspase-mediated degradation of cytochrome c in apoptotic cerebellar granule cells. *FEBS Lett* **457**, 126-130 (1999).
- 89 Lauber K, *et al.* The adapter protein apoptotic protease-activating factor-1 (Apaf-1) is proteolytically processed during apoptosis. *J Biol Chem* **276**, 29772-29781 (2001).
- 90 Hao Y, *et al.* Apollon ubiquitinates SMAC and caspase-9, and has an essential cytoprotection function. *Nat Cell Biol* **6**, 849-860 (2004).
- 91 Tan M, *et al.* SAG/ROC-SCF  $\beta$ -TrCP E3 ubiquitin ligase promotes pro-caspase-3 degradation as a mechanism of apoptosis protection. *Neoplasia* **8**, 1042-1054 (2006).
- 92 Du JQ, *et al.* Isoquinoline-1, 3, 4-trione derivatives inactivate caspase-3 by generation of reactive oxygen species. *J Biol Chem* **283**, 30205-30215 (2008).
- 93 Kumar MS, *et al.* Designing a promotor for a novel target site identified in caspases for initiating apoptosis in cancer cells. *Information and Communication Technologies*. 62-67 (Springer, 2010).
